# Supplementary material for: Application for simulating public health problems during floods around the Loei River in Thailand: the implementation of a geographic information system and structural equation model
Source: Springer Nature journal article supplement (doi:10.1186/s12889-022-14018-7), 2022-08-31
Supplement: MOESM1 [file 23435150]

## Questionnaire

Application for Simulating Public Health Problems during Floods around the Loei River in Thailand: The Implementation of a Geographic Information System and Structural Equation Model

---

The objectives of this study are to investigate the causal model among public health problems during floods, flood severity, preparation, and help and to develop an application with structural equation model and geographic information system to simulate public health problems around the Loei River during floods.

The results will be summarized as a whole. Therefore, the answers from this questionnaire will be the great benefit in being a guideline for preventing public health problems caused by flooding as well as beneficial to the general public.

This questionnaire is divided into 5 parts as follows:

Part 1 General information

Part 2 Preparation

Part 3 Help

Part 4 Flood severity

Part 5 Public Health Problem

Thank you for your kind cooperation in answering this questionnaire.

### Managed research by

Asst. Prof. Dr. Tanunchai Boonnuk et. al.

Public Health Program

Faculty of Science and Technology, Loei Rajabhat University, Thailand





**Part 5 Public Health Problem**

How many public health problems does your household suffer from floods?

| Public Health Problem      | Problem Level |   |   |   |   |   |   |   |   |   |    |
|----------------------------|---------------|---|---|---|---|---|---|---|---|---|----|
|                            | 0             | 1 | 2 | 3 | 4 | 5 | 6 | 7 | 8 | 9 | 10 |
| 1. Drowning                |               |   |   |   |   |   |   |   |   |   |    |
| 2. Electric current injury |               |   |   |   |   |   |   |   |   |   |    |
| 3. Accident injury         |               |   |   |   |   |   |   |   |   |   |    |
| 4. Malnutrition            |               |   |   |   |   |   |   |   |   |   |    |
| 5. Poisoning               |               |   |   |   |   |   |   |   |   |   |    |
| 6. Contagious              |               |   |   |   |   |   |   |   |   |   |    |
| 7. Poisonous animal bites  |               |   |   |   |   |   |   |   |   |   |    |
| 8. Stressed                |               |   |   |   |   |   |   |   |   |   |    |
| 9. Depressed               |               |   |   |   |   |   |   |   |   |   |    |
| 10. Shocked/Fear           |               |   |   |   |   |   |   |   |   |   |    |

Thank you for your cooperation in answering this questionnaire.
