# Supplementary material for: Application for simulating public health problems during floods around the Loei River in Thailand: the implementation of a geographic information system and structural equation model
Source: Springer Nature journal article supplement (doi:10.1186/s12889-022-14018-7), 2022-08-31
Supplement: MOESM3 [file 23435150]

DATASET ACTIVATE DataSet1.

FREQUENCIES VARIABLES=district subdist gender agegr status edu occupa incgr n  
omemgr  
/ORDER=ANALYSIS.

## Frequencies

[DataSet1] D:\วิดีโอและเอกสารเพิ่มเติมวิจัยน้ำท่วม\flooddata.sav

### Statistics

|   |         | District | Sub District | Gender | Age Group | Marital Status | Education |
|---|---------|----------|--------------|--------|-----------|----------------|-----------|
| N | Valid   | 560      | 560          | 560    | 560       | 560            | 560       |
|   | Missing | 0        | 0            | 0      | 0         | 0              | 0         |

### Statistics

|   |         | Occupation | Income Group | Number Of Member Group |
|---|---------|------------|--------------|------------------------|
| N | Valid   | 560        | 560          | 560                    |
|   | Missing | 0          | 0            | 0                      |

## Frequency Table

### District

|       |            | Frequency | Percent | Valid Percent | Cumulative Percent |
|-------|------------|-----------|---------|---------------|--------------------|
| Valid | Chiangkhan | 134       | 23.9    | 23.9          | 23.9               |
|       | Muangloei  | 147       | 26.3    | 26.3          | 50.2               |
|       | Phuloung   | 126       | 22.5    | 22.5          | 72.7               |
|       | Wangsapung | 153       | 27.3    | 27.3          | 100.0              |
|       | Total      | 560       | 100.0   | 100.0         |                    |

**Sub District**

|       |             | Frequency | Percent | Valid Percent | Cumulative Percent |
|-------|-------------|-----------|---------|---------------|--------------------|
| Valid | Chaiyapruk  | 22        | 3.9     | 3.9           | 3.9                |
|       | Chiangkhan  | 24        | 4.3     | 4.3           | 8.2                |
|       | Hadsaikaw   | 27        | 4.8     | 4.8           | 13.0               |
|       | Jomsri      | 10        | 1.8     | 1.8           | 14.8               |
|       | Kangsripum  | 38        | 6.8     | 6.8           | 21.6               |
|       | Kudpong     | 13        | 2.3     | 2.3           | 23.9               |
|       | Loeiwangsai | 68        | 12.1    | 12.1          | 36.1               |
|       | Muang       | 17        | 3.0     | 3.0           | 39.1               |
|       | Naarn       | 15        | 2.7     | 2.7           | 41.8               |
|       | Nakam       | 18        | 3.2     | 3.2           | 45.0               |
|       | Naor        | 19        | 3.4     | 3.4           | 48.4               |
|       | Napong      | 14        | 2.5     | 2.5           | 50.9               |
|       | Nasow       | 30        | 5.4     | 5.4           | 56.3               |
|       | Nongkan     | 9         | 1.6     | 1.6           | 57.9               |
|       | Pabing      | 23        | 4.1     | 4.1           | 62.0               |
|       | Pakpoun     | 21        | 3.8     | 3.8           | 65.7               |
|       | Paktom      | 16        | 2.9     | 2.9           | 68.6               |
|       | Panoi       | 19        | 3.4     | 3.4           | 72.0               |
|       | Phuhor      | 11        | 2.0     | 2.0           | 73.9               |
|       | Saikaw      | 40        | 7.1     | 7.1           | 81.1               |
|       | Srisongkram | 21        | 3.8     | 3.8           | 84.8               |
|       | Srisongrak  | 29        | 5.2     | 5.2           | 90.0               |
|       | Tad         | 27        | 4.8     | 4.8           | 94.8               |
|       | Wangsapung  | 29        | 5.2     | 5.2           | 100.0              |
|       | Total       | 560       | 100.0   | 100.0         |                    |

**Gender**

|       |        | Frequency | Percent | Valid Percent | Cumulative Percent |
|-------|--------|-----------|---------|---------------|--------------------|
| Valid | Male   | 208       | 37.1    | 37.1          | 37.1               |
|       | Female | 352       | 62.9    | 62.9          | 100.0              |
|       | Total  | 560       | 100.0   | 100.0         |                    |

**Age Group**

|                          | Frequency | Percent | Valid Percent | Cumulative Percent |
|--------------------------|-----------|---------|---------------|--------------------|
| Valid Under 35 years old | 83        | 14.8    | 14.8          | 14.8               |
| 35-59 years old          | 258       | 46.1    | 46.1          | 60.9               |
| 60 years old and over    | 219       | 39.1    | 39.1          | 100.0              |
| Total                    | 560       | 100.0   | 100.0         |                    |

**Marital Status**

|                            | Frequency | Percent | Valid Percent | Cumulative Percent |
|----------------------------|-----------|---------|---------------|--------------------|
| Valid Single               | 70        | 12.5    | 12.5          | 12.5               |
| Married                    | 477       | 85.2    | 85.2          | 97.7               |
| Widowed/divorced/separated | 13        | 2.3     | 2.3           | 100.0              |
| Total                      | 560       | 100.0   | 100.0         |                    |

**Education**

|                           | Frequency | Percent | Valid Percent | Cumulative Percent |
|---------------------------|-----------|---------|---------------|--------------------|
| Valid None                | 20        | 3.6     | 3.6           | 3.6                |
| Elementary                | 398       | 71.1    | 71.1          | 74.6               |
| High school               | 113       | 20.2    | 20.2          | 94.8               |
| Diploma/Bachelor's degree | 28        | 5.0     | 5.0           | 99.8               |
| Master's degree or higher | 1         | .2      | .2            | 100.0              |
| Total                     | 560       | 100.0   | 100.0         |                    |

**Occupation**

|                  | Frequency | Percent | Valid Percent | Cumulative Percent |
|------------------|-----------|---------|---------------|--------------------|
| Valid Unemployed | 100       | 17.9    | 17.9          | 17.9               |
| Freelancer       | 68        | 12.1    | 12.1          | 30.0               |
| Farmer           | 298       | 53.2    | 53.2          | 83.2               |
| Merchant/vender  | 68        | 12.1    | 12.1          | 95.4               |
| Civil servant    | 9         | 1.6     | 1.6           | 97.0               |
| Others           | 17        | 3.0     | 3.0           | 100.0              |
| Total            | 560       | 100.0   | 100.0         |                    |

### Income Group

|                       | Frequency | Percent | Valid Percent | Cumulative Percent |
|-----------------------|-----------|---------|---------------|--------------------|
| Valid No income       | 47        | 8.4     | 8.4           | 8.4                |
| Less than 1,000 Baht  | 115       | 20.5    | 20.5          | 28.9               |
| 1,001-10,000 Baht     | 349       | 62.3    | 62.3          | 91.3               |
| More than 10,000 Baht | 49        | 8.8     | 8.8           | 100.0              |
| Total                 | 560       | 100.0   | 100.0         |                    |

### Number Of Member Group

|                     | Frequency | Percent | Valid Percent | Cumulative Percent |
|---------------------|-----------|---------|---------------|--------------------|
| Valid 1-3 member(s) | 118       | 21.1    | 21.1          | 21.1               |
| 4-6 members         | 360       | 64.3    | 64.3          | 85.4               |
| 7 members or over   | 82        | 14.6    | 14.6          | 100.0              |
| Total               | 560       | 100.0   | 100.0         |                    |

```
DESCRIPTIVES VARIABLES=age nomem  
/STATISTICS=MEAN STDDEV MIN MAX.
```

## Descriptives

[DataSet1] D:\วิดีโอและเอกสารเพิ่มเติมวิจัยน้ำท่วม\flooddata.sav

### Descriptive Statistics

|                    | N   | Minimum | Maximum | Mean  | Std. Deviation |
|--------------------|-----|---------|---------|-------|----------------|
| Age                | 560 | 20      | 96      | 53.23 | 16.508         |
| Number Of Member   | 560 | 1       | 11      | 4.79  | 1.660          |
| Valid N (listwise) | 560 |         |         |       |                |

```
FREQUENCIES VARIABLES=income  
/FORMAT=NOTABLE  
/STATISTICS=MINIMUM MAXIMUM MEDIAN  
/ORDER=ANALYSIS.
```

## Frequencies

[DataSet1] D:\วิดีโอและเอกสารเพิ่มเติมวิจัยน้ำท่วม\flooddata.sav

### Statistics

Income

|         |         |         |
|---------|---------|---------|
| N       | Valid   | 560     |
|         | Missing | 0       |
| Median  |         | 3000.00 |
| Minimum |         | 0       |
| Maximum |         | 60000   |
