# Supplementary material for: Application for simulating public health problems during floods around the Loei River in Thailand: the implementation of a geographic information system and structural equation model
Source: Springer Nature journal article supplement (doi:10.1186/s12889-022-14018-7), 2022-08-31
Supplement: MOESM4 [file 23435150]

Mplus VERSION 7.4  
MUTHEN & MUTHEN  
03/31/2022 7:59 PM

INPUT INSTRUCTIONS

TITLE: Flood

DATA:

FILE IS "D:\flood.dat";

VARIABLE:

NAMES ARE prep1-prep4 help1-help4 fprb1-fprb10 phprb1-phprb10;  
USEVARIABLES ARE prep1-prep4 help1-help4 fprb1-fprb10 phprb1-phprb10;  
!CATEGORICAL b1-b7;

ANALYSIS:

TYPE IS GENERAL;  
ESTIMATOR IS ML;  
ITERATIONS = 20000;  
CONVERGENCE = 0.00001;

MODEL:

prep BY prep1-prep4;  
help BY help1-help4;  
fprb BY fprb1-fprb10;  
phprb BY phprb1-phprb10;  
help ON prep;  
phprb ON prep fprb help;  
FPRB2 WITH FPRB1;  
FPRB4 WITH FPRB3;  
PHPRB10 WITH PHPRB9;  
PHPRB7 WITH PHPRB6;  
PREP4 WITH PREP3;  
HELP2 WITH HELP1;  
PHPRB2 WITH PHPRB1;  
FPRB9 WITH FPRB8;  
FPRB10 WITH FPRB9;  
FPRB WITH HELP;  
PHPRB5 WITH PHPRB4;  
FPRB10 WITH FPRB8;  
PHPRB6 WITH PHPRB5;  
PHPRB7 WITH PHPRB5;  
FPRB7 WITH FPRB5;  
PREP3 WITH PREP2;  
PHPRB8 WITH PHPRB7;  
PHPRB8 WITH PHPRB6;  
PHPRB6 WITH FPRB9;  
PHPRB7 WITH FPRB9;  
PHPRB6 WITH PHPRB4;  
PHPRB7 WITH PHPRB4;  
PHPRB8 WITH FPRB6;  
PHPRB8 WITH PHPRB5;  
PHPRB9 WITH FPRB8;  
PHPRB9 WITH PHPRB8;  
PHPRB10 WITH PHPRB8;  
PHPRB8 WITH FPRB8;  
HELP1 WITH PREP1;  
HELP2 WITH PREP1;  
PHPRB3 WITH PHPRB2;  
PHPRB10 WITH FPRB8;  
PHPRB4 WITH PREP3;  
PHPRB4 WITH PREP4;  
FPRB8 WITH FPRB5;

PHPRB2 WITH FPRB2;  
PHPRB2 WITH FPRB9;  
PHPRB2 WITH FPRB7;  
PHPRB6 WITH FPRB2;  
PHPRB5 WITH FPRB3;  
PHPRB5 WITH FPRB9;  
PHPRB5 WITH FPRB4;  
FPRB5 WITH FPRB4;  
FPRB5 WITH HELP3;  
HELP2 WITH PREP2;  
HELP1 WITH PREP2;  
PREP2 WITH PREP1;  
PHPRB4 WITH HELP3;  
PHPRB6 WITH FPRB10;  
PHPRB5 WITH FPRB10;  
PHPRB7 WITH FPRB10;  
PHPRB4 WITH FPRB8;  
PHPRB8 WITH FPRB10;  
PHPRB8 WITH PREP4;  
FPRB2 WITH HELP1;  
PHPRB1 WITH PREP1;  
PHPRB4 WITH FPRB10;  
PHPRB9 WITH PREP3;  
FPRB10 WITH HELP3;  
FPRB10 WITH FPRB3;  
FPRB9 WITH FPRB5;  
FPRB5 WITH FPRB3;  
PHPRB7 WITH FPRB5;  
PHPRB7 WITH FPRB8;  
PHPRB6 WITH FPRB8;  
PHPRB5 WITH FPRB8;  
PHPRB4 WITH FPRB9;  
HELP4 WITH HELP2;  
PHPRB2 WITH PREP4;  
PHPRB8 WITH HELP2;  
PHPRB9 WITH PHPRB7;  
PHPRB10 WITH PHPRB7;  
PHPRB7 WITH PHPRB1;  
PHPRB9 WITH PHPRB6;  
PHPRB10 WITH PHPRB6;  
PHPRB5 WITH FPRB5;  
PHPRB5 WITH FPRB6;  
PHPRB5 WITH FPRB7;  
PHPRB10 WITH FPRB5;  
PHPRB10 WITH PHPRB3;  
PHPRB10 WITH HELP4;  
PHPRB9 WITH FPRB6;  
PHPRB10 WITH FPRB6;  
FPRB10 WITH FPRB5;  
FPRB10 WITH FPRB4;  
FPRB8 WITH FPRB4;  
FPRB8 WITH PREP3;  
FPRB5 WITH PREP3;  
FPRB5 WITH PREP4;  
PHPRB3 WITH FPRB6;  
PHPRB3 WITH FPRB7;  
PHPRB3 WITH FPRB5;  
PHPRB3 WITH PREP2;  
PHPRB3 WITH PREP1;  
PHPRB4 WITH PHPRB3;  
FPRB10 WITH FPRB2;  
FPRB7 WITH FPRB2;  
FPRB7 WITH FPRB1;  
FPRB4 WITH PREP3;

FPRB9 WITH PREP2;  
FPRB9 WITH PREP1;  
PHPRB9 WITH FPRB9;  
PHPRB10 WITH FPRB9;  
PHPRB8 WITH PREP1;  
PHPRB2 WITH HELP2;  
HELP3 WITH HELP1;  
FPRB7 WITH PREP2;  
FPRB6 WITH PREP2;  
FPRB6 WITH PREP1;  
FPRB7 WITH PREP1;  
PHPRB1 WITH FPRB7;  
PHPRB1 WITH PREP2;  
PHPRB2 WITH PREP2;  
PHPRB6 WITH PREP4;  
PHPRB7 WITH PREP4;  
PHPRB6 WITH PREP3;  
PHPRB7 WITH PREP3;  
PHPRB5 WITH PREP2;  
PHPRB5 WITH PREP1;  
PHPRB6 WITH FPRB5;  
FPRB10 WITH FPRB7;  
FPRB10 WITH FPRB6;  
FPRB7 WITH HELP3;  
PHPRB10 WITH PHPRB2;  
FPRB6 WITH HELP3;  
PHPRB4 WITH HELP2;  
PHPRB4 WITH PHPRB2;  
PHPRB4 WITH PHPRB1;  
PHPRB4 WITH FPRB7;  
PHPRB4 WITH FPRB6;  
PHPRB6 WITH FPRB1;  
PHPRB5 WITH FPRB1;  
PHPRB5 WITH FPRB2;  
FPRB10 WITH FPRB1;  
PHPRB6 WITH FPRB6;  
PHPRB6 WITH FPRB7;  
PHPRB7 WITH FPRB7;  
FPRB9 WITH FPRB7;  
FPRB8 WITH FPRB7;  
PHPRB8 WITH FPRB7;  
PHPRB8 WITH PREP2;  
PHPRB10 WITH PREP3;  
PHPRB6 WITH HELP4;  
PHPRB5 WITH HELP4;  
PHPRB7 WITH HELP4;  
FPRB9 WITH HELP4;  
FPRB8 WITH HELP4;  
FPRB10 WITH HELP4;  
PHPRB1 WITH HELP3;  
FPRB8 WITH HELP3;  
FPRB9 WITH HELP3;  
PHPRB6 WITH HELP3;  
PHPRB7 WITH HELP3;  
PHPRB5 WITH HELP3;  
PHPRB4 WITH HELP4;  
FPRB6 WITH HELP4;  
FPRB6 WITH PREP3;  
FPRB7 WITH PREP4;  
FPRB7 WITH PREP3;  
PHPRB2 WITH FPRB6;  
PHPRB2 WITH PREP3;  
FPRB7 WITH FPRB6;  
PHPRB1 WITH FPRB5;

```

FPRB8 WITH FPRB6;
FPRB9 WITH FPRB6;
FPRB6 WITH FPRB5;
PHPRB7 WITH FPRB6;
PHPRB9 WITH FPRB5;
PHPRB8 WITH FPRB5;
FPRB7 WITH HELP4;
FPRB5 WITH HELP4;
PHPRB4 WITH FPRB2;
PHPRB3 WITH FPRB2;
PHPRB10 WITH FPRB2;
PHPRB10 WITH FPRB1;
PHPRB3 WITH FPRB1;
PHPRB2 WITH FPRB1;
PHPRB4 WITH FPRB1;
PHPRB6 WITH PHPRB3;
FPRB10 WITH PREP1;
FPRB8 WITH PREP1;
FPRB8 WITH PREP2;
FPRB10 WITH PREP2;
FPRB8 WITH PREP4;
FPRB5 WITH PREP1;

```

OUTPUT: SAMPSTAT MODINDICES(0) STANDARDIZED;

INPUT READING TERMINATED NORMALLY

Flood

SUMMARY OF ANALYSIS

|                                       |     |
|---------------------------------------|-----|
| Number of groups                      | 1   |
| Number of observations                | 560 |
| Number of dependent variables         | 28  |
| Number of independent variables       | 0   |
| Number of continuous latent variables | 4   |

Observed dependent variables

Continuous

|        |        |        |         |        |        |
|--------|--------|--------|---------|--------|--------|
| PREP1  | PREP2  | PREP3  | PREP4   | HELP1  | HELP2  |
| HELP3  | HELP4  | FPRB1  | FPRB2   | FPRB3  | FPRB4  |
| FPRB5  | FPRB6  | FPRB7  | FPRB8   | FPRB9  | FPRB10 |
| PHPRB1 | PHPRB2 | PHPRB3 | PHPRB4  | PHPRB5 | PHPRB6 |
| PHPRB7 | PHPRB8 | PHPRB9 | PHPRB10 |        |        |

Continuous latent variables

|      |      |      |       |
|------|------|------|-------|
| PREP | HELP | FPRB | PHPRB |
|------|------|------|-------|

|                                               |           |
|-----------------------------------------------|-----------|
| Estimator                                     | ML        |
| Information matrix                            | OBSERVED  |
| Maximum number of iterations                  | 20000     |
| Convergence criterion                         | 0.100D-04 |
| Maximum number of steepest descent iterations | 20        |

Input data file(s)  
D:\flood.dat

Input data format FREE

## SAMPLE STATISTICS

## SAMPLE STATISTICS

| Means       |              |              |              |              |              |
|-------------|--------------|--------------|--------------|--------------|--------------|
|             | PREP1        | PREP2        | PREP3        | PREP4        | HELP1        |
| 1           | <u>2.721</u> | <u>2.771</u> | <u>3.064</u> | <u>3.013</u> | <u>3.727</u> |
| Means       |              |              |              |              |              |
|             | HELP2        | HELP3        | HELP4        | FPRB1        | FPRB2        |
| 1           | <u>3.752</u> | <u>4.043</u> | <u>4.116</u> | <u>2.159</u> | <u>2.180</u> |
| Means       |              |              |              |              |              |
|             | FPRB3        | FPRB4        | FPRB5        | FPRB6        | FPRB7        |
| 1           | <u>1.496</u> | <u>1.466</u> | <u>2.677</u> | <u>3.577</u> | <u>2.973</u> |
| Means       |              |              |              |              |              |
|             | FPRB8        | FPRB9        | FPRB10       | PHPRB1       | PHPRB2       |
| 1           | <u>3.375</u> | <u>3.159</u> | <u>2.870</u> | <u>0.446</u> | <u>0.445</u> |
| Means       |              |              |              |              |              |
|             | PHPRB3       | PHPRB4       | PHPRB5       | PHPRB6       | PHPRB7       |
| 1           | <u>0.561</u> | <u>0.852</u> | <u>1.436</u> | <u>2.948</u> | <u>3.239</u> |
| Means       |              |              |              |              |              |
|             | PHPRB8       | PHPRB9       | PHPRB10      |              |              |
| 1           | <u>5.775</u> | <u>5.714</u> | <u>5.911</u> |              |              |
| Covariances |              |              |              |              |              |
|             | PREP1        | PREP2        | PREP3        | PREP4        | HELP1        |
| PREP1       | <u>4.540</u> |              |              |              |              |
| PREP2       | 4.435        | <u>4.544</u> |              |              |              |
| PREP3       | 4.646        | 4.752        | <u>5.946</u> |              |              |
| PREP4       | 4.695        | 4.721        | 5.781        | <u>6.062</u> |              |
| HELP1       | 2.529        | 2.438        | 2.419        | 2.471        | <u>6.731</u> |
| HELP2       | 2.547        | 2.486        | 2.464        | 2.525        | 6.552        |
| HELP3       | 2.630        | 2.642        | 3.022        | 3.083        | 6.156        |
| HELP4       | 2.706        | 2.705        | 3.091        | 3.154        | 6.169        |
| FPRB1       | -0.158       | -0.167       | -0.201       | -0.239       | 1.890        |
| FPRB2       | -0.189       | -0.194       | -0.217       | -0.254       | 1.847        |
| FPRB3       | -0.255       | -0.262       | -0.159       | -0.137       | 0.448        |
| FPRB4       | -0.179       | -0.183       | -0.050       | -0.050       | 0.474        |
| FPRB5       | 0.376        | 0.446        | 0.901        | 0.833        | 1.997        |
| FPRB6       | 1.262        | 1.341        | 1.433        | 1.364        | 3.243        |
| FPRB7       | 0.601        | 0.681        | 0.616        | 0.588        | 3.734        |
| FPRB8       | 0.378        | 0.468        | 1.085        | 1.020        | 1.847        |

---

|         |        |        |        |        |        |
|---------|--------|--------|--------|--------|--------|
| FPRB9   | 0.925  | 1.008  | 1.679  | 1.727  | 2.679  |
| FPRB10  | 0.546  | 0.633  | 1.091  | 1.116  | 2.132  |
| PHPRB1  | -0.122 | -0.114 | -0.136 | -0.118 | -0.060 |
| PHPRB2  | -0.140 | -0.113 | -0.098 | -0.061 | -0.155 |
| PHPRB3  | -0.147 | -0.113 | -0.129 | -0.100 | -0.156 |
| PHPRB4  | -0.075 | -0.071 | -0.201 | -0.129 | 0.583  |
| PHPRB5  | 0.193  | 0.207  | 0.636  | 0.689  | 0.808  |
| PHPRB6  | 1.689  | 1.752  | 2.685  | 2.795  | 1.966  |
| PHPRB7  | 2.111  | 2.162  | 3.163  | 3.261  | 2.010  |
| PHPRB8  | 1.577  | 1.622  | 2.436  | 2.203  | 1.051  |
| PHPRB9  | 2.103  | 2.124  | 3.049  | 2.891  | 1.363  |
| PHPRB10 | 1.832  | 1.849  | 2.665  | 2.564  | 1.588  |

|         | Covariances |        |        |       |       |
|---------|-------------|--------|--------|-------|-------|
|         | HELP2       | HELP3  | HELP4  | FPRB1 | FPRB2 |
| HELP2   | 6.601       |        |        |       |       |
| HELP3   | 6.159       | 7.095  |        |       |       |
| HELP4   | 6.138       | 6.813  | 7.238  |       |       |
| FPRB1   | 1.913       | 1.745  | 1.796  | 4.130 |       |
| FPRB2   | 1.895       | 1.755  | 1.809  | 4.046 | 4.176 |
| FPRB3   | 0.504       | 0.604  | 0.664  | 1.969 | 2.066 |
| FPRB4   | 0.530       | 0.641  | 0.701  | 1.997 | 2.102 |
| FPRB5   | 2.020       | 2.139  | 2.373  | 3.060 | 3.107 |
| FPRB6   | 3.290       | 3.320  | 3.463  | 3.753 | 3.819 |
| FPRB7   | 3.772       | 3.821  | 4.012  | 4.340 | 4.351 |
| FPRB8   | 1.861       | 2.513  | 2.606  | 2.578 | 2.582 |
| FPRB9   | 2.709       | 3.345  | 3.474  | 2.810 | 2.830 |
| FPRB10  | 2.166       | 2.550  | 2.744  | 2.835 | 2.818 |
| PHPRB1  | -0.020      | -0.069 | -0.011 | 0.272 | 0.271 |
| PHPRB2  | -0.124      | -0.130 | -0.082 | 0.226 | 0.193 |
| PHPRB3  | -0.104      | -0.088 | -0.062 | 0.338 | 0.322 |
| PHPRB4  | 0.647       | 0.567  | 0.723  | 1.102 | 1.077 |
| PHPRB5  | 0.853       | 1.146  | 1.290  | 1.397 | 1.362 |
| PHPRB6  | 2.041       | 2.633  | 2.835  | 1.540 | 1.591 |
| PHPRB7  | 2.063       | 2.733  | 2.897  | 1.205 | 1.193 |
| PHPRB8  | 1.042       | 1.517  | 1.601  | 0.680 | 0.723 |
| PHPRB9  | 1.411       | 1.887  | 1.958  | 0.740 | 0.777 |
| PHPRB10 | 1.626       | 2.059  | 2.060  | 1.000 | 1.061 |

|         | Covariances |        |       |       |        |
|---------|-------------|--------|-------|-------|--------|
|         | FPRB3       | FPRB4  | FPRB5 | FPRB6 | FPRB7  |
| FPRB3   | 3.214       |        |       |       |        |
| FPRB4   | 3.131       | 3.363  |       |       |        |
| FPRB5   | 2.432       | 2.540  | 6.983 |       |        |
| FPRB6   | 2.410       | 2.445  | 5.315 | 9.523 |        |
| FPRB7   | 2.570       | 2.596  | 5.179 | 7.628 | 11.097 |
| FPRB8   | 1.555       | 1.507  | 4.660 | 4.862 | 5.917  |
| FPRB9   | 1.703       | 1.710  | 4.619 | 5.201 | 6.395  |
| FPRB10  | 2.009       | 1.964  | 4.335 | 5.068 | 6.168  |
| PHPRB1  | 0.418       | 0.451  | 0.509 | 0.509 | 0.471  |
| PHPRB2  | 0.420       | 0.445  | 0.472 | 0.415 | 0.289  |
| PHPRB3  | 0.491       | 0.523  | 0.472 | 0.353 | 0.454  |
| PHPRB4  | 0.916       | 0.949  | 1.284 | 1.423 | 1.762  |
| PHPRB5  | 1.196       | 1.158  | 2.077 | 2.134 | 2.506  |
| PHPRB6  | 0.451       | 0.508  | 2.446 | 2.792 | 3.222  |
| PHPRB7  | -0.003      | 0.042  | 2.349 | 2.355 | 2.753  |
| PHPRB8  | -0.299      | -0.240 | 1.733 | 2.407 | 1.362  |
| PHPRB9  | -0.117      | -0.061 | 1.958 | 2.877 | 1.739  |
| PHPRB10 | -0.232      | -0.182 | 1.855 | 3.064 | 1.980  |

| Covariances |       |       |        |        |        |
|-------------|-------|-------|--------|--------|--------|
|             | FPRB8 | FPRB9 | FPRB10 | PHPRB1 | PHPRB2 |
| FPRB8       | 7.327 |       |        |        |        |
| FPRB9       | 6.217 | 7.348 |        |        |        |
| FPRB10      | 5.279 | 6.110 | 6.749  |        |        |
| PHPRB1      | 0.277 | 0.236 | 0.255  | 1.290  |        |
| PHPRB2      | 0.298 | 0.181 | 0.263  | 1.276  | 1.493  |
| PHPRB3      | 0.347 | 0.341 | 0.389  | 1.055  | 1.161  |
| PHPRB4      | 0.965 | 1.118 | 1.300  | 0.979  | 1.007  |
| PHPRB5      | 2.210 | 2.493 | 2.573  | 0.698  | 0.778  |
| PHPRB6      | 3.319 | 4.210 | 3.422  | 0.537  | 0.625  |
| PHPRB7      | 3.433 | 3.994 | 3.072  | 0.284  | 0.415  |
| PHPRB8      | 2.422 | 1.964 | 1.483  | -0.221 | -0.264 |
| PHPRB9      | 2.670 | 2.440 | 2.072  | -0.212 | -0.235 |
| PHPRB10     | 2.433 | 2.532 | 2.156  | -0.215 | -0.282 |

  

| Covariances |        |        |        |        |        |
|-------------|--------|--------|--------|--------|--------|
|             | PHPRB3 | PHPRB4 | PHPRB5 | PHPRB6 | PHPRB7 |
| PHPRB3      | 1.457  |        |        |        |        |
| PHPRB4      | 1.253  | 2.301  |        |        |        |
| PHPRB5      | 0.986  | 1.766  | 3.653  |        |        |
| PHPRB6      | 0.700  | 1.339  | 3.081  | 6.428  |        |
| PHPRB7      | 0.412  | 0.921  | 2.590  | 6.073  | 7.689  |
| PHPRB8      | -0.551 | -0.589 | 0.418  | 2.956  | 4.032  |
| PHPRB9      | -0.527 | -0.537 | 0.671  | 3.373  | 4.295  |
| PHPRB10     | -0.586 | -0.486 | 0.651  | 3.447  | 4.291  |

  

| Covariances |        |        |         |
|-------------|--------|--------|---------|
|             | PHPRB8 | PHPRB9 | PHPRB10 |
| PHPRB8      | 8.778  |        |         |
| PHPRB9      | 7.739  | 8.497  |         |
| PHPRB10     | 7.685  | 7.846  | 8.831   |

  

| Correlations |        |        |        |        |        |
|--------------|--------|--------|--------|--------|--------|
|              | PREP1  | PREP2  | PREP3  | PREP4  | HELP1  |
| PREP1        | 1.000  |        |        |        |        |
| PREP2        | 0.976  | 1.000  |        |        |        |
| PREP3        | 0.894  | 0.914  | 1.000  |        |        |
| PREP4        | 0.895  | 0.899  | 0.963  | 1.000  |        |
| HELP1        | 0.458  | 0.441  | 0.382  | 0.387  | 1.000  |
| HELP2        | 0.465  | 0.454  | 0.393  | 0.399  | 0.983  |
| HELP3        | 0.463  | 0.465  | 0.465  | 0.470  | 0.891  |
| HELP4        | 0.472  | 0.472  | 0.471  | 0.476  | 0.884  |
| FPRB1        | -0.036 | -0.039 | -0.041 | -0.048 | 0.358  |
| FPRB2        | -0.043 | -0.045 | -0.044 | -0.050 | 0.348  |
| FPRB3        | -0.067 | -0.068 | -0.036 | -0.031 | 0.096  |
| FPRB4        | -0.046 | -0.047 | -0.011 | -0.011 | 0.100  |
| FPRB5        | 0.067  | 0.079  | 0.140  | 0.128  | 0.291  |
| FPRB6        | 0.192  | 0.204  | 0.190  | 0.180  | 0.405  |
| FPRB7        | 0.085  | 0.096  | 0.076  | 0.072  | 0.432  |
| FPRB8        | 0.065  | 0.081  | 0.164  | 0.153  | 0.263  |
| FPRB9        | 0.160  | 0.174  | 0.254  | 0.259  | 0.381  |
| FPRB10       | 0.099  | 0.114  | 0.172  | 0.174  | 0.316  |
| PHPRB1       | -0.050 | -0.047 | -0.049 | -0.042 | -0.020 |
| PHPRB2       | -0.054 | -0.043 | -0.033 | -0.020 | -0.049 |
| PHPRB3       | -0.057 | -0.044 | -0.044 | -0.034 | -0.050 |

---

|         |        |        |        |        |       |
|---------|--------|--------|--------|--------|-------|
| PHPRB4  | -0.023 | -0.022 | -0.054 | -0.034 | 0.148 |
| PHPRB5  | 0.047  | 0.051  | 0.137  | 0.146  | 0.163 |
| PHPRB6  | 0.313  | 0.324  | 0.434  | 0.448  | 0.299 |
| PHPRB7  | 0.357  | 0.366  | 0.468  | 0.478  | 0.279 |
| PHPRB8  | 0.250  | 0.257  | 0.337  | 0.302  | 0.137 |
| PHPRB9  | 0.339  | 0.342  | 0.429  | 0.403  | 0.180 |
| PHPRB10 | 0.289  | 0.292  | 0.368  | 0.350  | 0.206 |

|         | Correlations<br>HELP2 | HELP3  | HELP4  | FPRB1 | FPRB2 |
|---------|-----------------------|--------|--------|-------|-------|
| HELP2   | 1.000                 |        |        |       |       |
| HELP3   | 0.900                 | 1.000  |        |       |       |
| HELP4   | 0.888                 | 0.951  | 1.000  |       |       |
| FPRB1   | 0.366                 | 0.322  | 0.328  | 1.000 |       |
| FPRB2   | 0.361                 | 0.322  | 0.329  | 0.974 | 1.000 |
| FPRB3   | 0.109                 | 0.126  | 0.138  | 0.540 | 0.564 |
| FPRB4   | 0.112                 | 0.131  | 0.142  | 0.536 | 0.561 |
| FPRB5   | 0.297                 | 0.304  | 0.334  | 0.570 | 0.575 |
| FPRB6   | 0.415                 | 0.404  | 0.417  | 0.598 | 0.606 |
| FPRB7   | 0.441                 | 0.431  | 0.448  | 0.641 | 0.639 |
| FPRB8   | 0.268                 | 0.348  | 0.358  | 0.469 | 0.467 |
| FPRB9   | 0.389                 | 0.463  | 0.476  | 0.510 | 0.511 |
| FPRB10  | 0.324                 | 0.369  | 0.393  | 0.537 | 0.531 |
| PHPRB1  | -0.007                | -0.023 | -0.004 | 0.118 | 0.117 |
| PHPRB2  | -0.039                | -0.040 | -0.025 | 0.091 | 0.077 |
| PHPRB3  | -0.033                | -0.027 | -0.019 | 0.138 | 0.131 |
| PHPRB4  | 0.166                 | 0.140  | 0.177  | 0.357 | 0.347 |
| PHPRB5  | 0.174                 | 0.225  | 0.251  | 0.360 | 0.349 |
| PHPRB6  | 0.313                 | 0.390  | 0.416  | 0.299 | 0.307 |
| PHPRB7  | 0.290                 | 0.370  | 0.388  | 0.214 | 0.210 |
| PHPRB8  | 0.137                 | 0.192  | 0.201  | 0.113 | 0.119 |
| PHPRB9  | 0.188                 | 0.243  | 0.250  | 0.125 | 0.130 |
| PHPRB10 | 0.213                 | 0.260  | 0.258  | 0.166 | 0.175 |

|         | Correlations<br>FPRB3 | FPRB4  | FPRB5 | FPRB6 | FPRB7 |
|---------|-----------------------|--------|-------|-------|-------|
| FPRB3   | 1.000                 |        |       |       |       |
| FPRB4   | 0.952                 | 1.000  |       |       |       |
| FPRB5   | 0.513                 | 0.524  | 1.000 |       |       |
| FPRB6   | 0.436                 | 0.432  | 0.652 | 1.000 |       |
| FPRB7   | 0.430                 | 0.425  | 0.588 | 0.742 | 1.000 |
| FPRB8   | 0.320                 | 0.304  | 0.652 | 0.582 | 0.656 |
| FPRB9   | 0.350                 | 0.344  | 0.645 | 0.622 | 0.708 |
| FPRB10  | 0.431                 | 0.412  | 0.631 | 0.632 | 0.713 |
| PHPRB1  | 0.205                 | 0.216  | 0.169 | 0.145 | 0.124 |
| PHPRB2  | 0.192                 | 0.198  | 0.146 | 0.110 | 0.071 |
| PHPRB3  | 0.227                 | 0.236  | 0.148 | 0.095 | 0.113 |
| PHPRB4  | 0.337                 | 0.341  | 0.320 | 0.304 | 0.349 |
| PHPRB5  | 0.349                 | 0.330  | 0.411 | 0.362 | 0.394 |
| PHPRB6  | 0.099                 | 0.109  | 0.365 | 0.357 | 0.381 |
| PHPRB7  | -0.001                | 0.008  | 0.321 | 0.275 | 0.298 |
| PHPRB8  | -0.056                | -0.044 | 0.221 | 0.263 | 0.138 |
| PHPRB9  | -0.022                | -0.012 | 0.254 | 0.320 | 0.179 |
| PHPRB10 | -0.044                | -0.033 | 0.236 | 0.334 | 0.200 |

|       | Correlations<br>FPRB8 | FPRB9 | FPRB10 | PHPRB1 | PHPRB2 |
|-------|-----------------------|-------|--------|--------|--------|
| FPRB8 | 1.000                 |       |        |        |        |

---



|         |       |       |       |        |        |
|---------|-------|-------|-------|--------|--------|
| FPRB9   | 0.847 | 1.000 |       |        |        |
| FPRB10  | 0.751 | 0.868 | 1.000 |        |        |
| PHPRB1  | 0.090 | 0.077 | 0.086 | 1.000  |        |
| PHPRB2  | 0.090 | 0.055 | 0.083 | 0.920  | 1.000  |
| PHPRB3  | 0.106 | 0.104 | 0.124 | 0.770  | 0.787  |
| PHPRB4  | 0.235 | 0.272 | 0.330 | 0.568  | 0.543  |
| PHPRB5  | 0.427 | 0.481 | 0.518 | 0.322  | 0.333  |
| PHPRB6  | 0.484 | 0.613 | 0.520 | 0.187  | 0.202  |
| PHPRB7  | 0.457 | 0.531 | 0.426 | 0.090  | 0.122  |
| PHPRB8  | 0.302 | 0.245 | 0.193 | -0.066 | -0.073 |
| PHPRB9  | 0.338 | 0.309 | 0.274 | -0.064 | -0.066 |
| PHPRB10 | 0.303 | 0.314 | 0.279 | -0.064 | -0.078 |

Correlations

|         | PHPRB3 | PHPRB4 | PHPRB5 | PHPRB6 | PHPRB7 |
|---------|--------|--------|--------|--------|--------|
| PHPRB3  | 1.000  |        |        |        |        |
| PHPRB4  | 0.684  | 1.000  |        |        |        |
| PHPRB5  | 0.427  | 0.609  | 1.000  |        |        |
| PHPRB6  | 0.229  | 0.348  | 0.636  | 1.000  |        |
| PHPRB7  | 0.123  | 0.219  | 0.489  | 0.864  | 1.000  |
| PHPRB8  | -0.154 | -0.131 | 0.074  | 0.394  | 0.491  |
| PHPRB9  | -0.150 | -0.121 | 0.120  | 0.456  | 0.531  |
| PHPRB10 | -0.163 | -0.108 | 0.115  | 0.458  | 0.521  |

Correlations

|         | PHPRB8 | PHPRB9 | PHPRB10 |
|---------|--------|--------|---------|
| PHPRB8  | 1.000  |        |         |
| PHPRB9  | 0.896  | 1.000  |         |
| PHPRB10 | 0.873  | 0.906  | 1.000   |

UNIVARIATE SAMPLE STATISTICS

UNIVARIATE HIGHER-ORDER MOMENT DESCRIPTIVE STATISTICS

| s | Variable/<br>Sample Size<br>Median | Mean/<br>Variance | Skewness/<br>Kurtosis | Minimum/<br>Maximum | % with<br>Min/Max | Percentile<br>20%/60% | Percentile<br>40%/80% |
|---|------------------------------------|-------------------|-----------------------|---------------------|-------------------|-----------------------|-----------------------|
|   | PREP1<br>2.000                     | 2.721             | 1.063                 | 0.000               | 10.71%            | 1.000                 | 2.000                 |
|   | 560.000                            | 4.540             | 0.933                 | 10.000              | 0.89%             | 3.000                 | 4.000                 |
|   | PREP2<br>2.000                     | 2.771             | 1.026                 | 0.000               | 10.89%            | 1.000                 | 2.000                 |
|   | 560.000                            | 4.544             | 0.874                 | 10.000              | 0.89%             | 3.000                 | 4.000                 |
|   | PREP3<br>2.000                     | 3.064             | 0.751                 | 0.000               | 13.21%            | 1.000                 | 2.000                 |
|   | 560.000                            | 5.946             | -0.227                | 10.000              | 0.89%             | 3.000                 | 5.000                 |
|   | PREP4<br>2.000                     | 3.013             | 0.763                 | 0.000               | 15.00%            | 1.000                 | 2.000                 |
|   | 560.000                            | 6.062             | -0.198                | 10.000              | 1.07%             | 3.000                 | 5.000                 |
|   | HELP1<br>3.000                     | 3.727             | 0.513                 | 0.000               | 8.75%             | 1.000                 | 3.000                 |
|   | 560.000                            | 6.731             | -0.549                | 10.000              | 2.32%             | 4.000                 | 6.000                 |
|   | HELP2<br>3.000                     | 3.752             | 0.510                 | 0.000               | 8.75%             | 1.000                 | 3.000                 |
|   | 560.000                            | 6.601             | -0.510                | 10.000              | 2.32%             | 4.000                 | 6.000                 |
|   | HELP3                              | 4.043             | 0.377                 | 0.000               | 8.04%             | 1.000                 | 3.000                 |

|         |         |        |        |        |        |       |       |
|---------|---------|--------|--------|--------|--------|-------|-------|
| 4.000   |         |        |        |        |        |       |       |
| HELPA   | 560.000 | 7.095  | -0.705 | 10.000 | 2.86%  | 5.000 | 6.000 |
| 4.000   |         | 4.116  | 0.336  | 0.000  | 8.21%  | 1.000 | 3.000 |
| FPRB1   | 560.000 | 7.238  | -0.754 | 10.000 | 3.04%  | 5.000 | 7.000 |
| 2.000   |         | 2.159  | 1.244  | 0.000  | 24.64% | 0.000 | 1.000 |
| FPRB2   | 560.000 | 4.130  | 1.644  | 10.000 | 0.36%  | 2.000 | 3.000 |
| 2.000   |         | 2.180  | 1.242  | 0.000  | 24.46% | 0.000 | 1.000 |
| FPRB3   | 560.000 | 4.176  | 1.619  | 10.000 | 0.36%  | 2.000 | 3.000 |
| 1.000   |         | 1.496  | 1.413  | 0.000  | 42.50% | 0.000 | 0.000 |
| FPRB4   | 560.000 | 3.214  | 1.999  | 9.000  | 0.36%  | 2.000 | 3.000 |
| 1.000   |         | 1.466  | 1.508  | 0.000  | 43.93% | 0.000 | 0.000 |
| FPRB5   | 560.000 | 3.363  | 2.187  | 9.000  | 0.36%  | 1.000 | 3.000 |
| 2.000   |         | 2.677  | 1.167  | 0.000  | 22.32% | 0.000 | 1.000 |
| FPRB6   | 560.000 | 6.983  | 0.644  | 10.000 | 3.04%  | 3.000 | 5.000 |
| 3.000   |         | 3.577  | 0.847  | 0.000  | 13.39% | 1.000 | 2.000 |
| FPRB7   | 560.000 | 9.523  | -0.404 | 10.000 | 9.64%  | 3.000 | 6.000 |
| 2.000   |         | 2.973  | 1.019  | 0.000  | 33.57% | 0.000 | 1.000 |
| FPRB8   | 560.000 | 11.097 | -0.226 | 10.000 | 10.54% | 3.000 | 6.000 |
| 3.000   |         | 3.375  | 0.645  | 0.000  | 16.79% | 1.000 | 2.000 |
| FPRB9   | 560.000 | 7.327  | -0.425 | 10.000 | 2.50%  | 4.000 | 6.000 |
| 3.000   |         | 3.159  | 0.839  | 0.000  | 16.61% | 1.000 | 2.000 |
| FPRB10  | 560.000 | 7.348  | -0.163 | 10.000 | 2.68%  | 3.000 | 5.000 |
| 2.000   |         | 2.870  | 0.900  | 0.000  | 19.29% | 1.000 | 2.000 |
| PHPRB1  | 560.000 | 6.749  | -0.012 | 10.000 | 1.79%  | 3.000 | 5.000 |
| 0.000   |         | 0.446  | 4.257  | 0.000  | 77.32% | 0.000 | 0.000 |
| PHPRB2  | 560.000 | 1.290  | 23.474 | 9.000  | 0.54%  | 0.000 | 1.000 |
| 0.000   |         | 0.445  | 4.629  | 0.000  | 79.11% | 0.000 | 0.000 |
| PHPRB3  | 560.000 | 1.493  | 26.982 | 10.000 | 0.36%  | 0.000 | 1.000 |
| 0.000   |         | 0.561  | 3.169  | 0.000  | 73.04% | 0.000 | 0.000 |
| PHPRB4  | 560.000 | 1.457  | 13.085 | 9.000  | 0.36%  | 0.000 | 1.000 |
| 0.000   |         | 0.852  | 2.118  | 0.000  | 66.79% | 0.000 | 0.000 |
| PHPRB5  | 560.000 | 2.301  | 4.861  | 9.000  | 0.36%  | 0.000 | 2.000 |
| 0.000   |         | 1.436  | 1.349  | 0.000  | 51.25% | 0.000 | 0.000 |
| PHPRB6  | 560.000 | 3.653  | 1.302  | 9.000  | 0.54%  | 1.000 | 3.000 |
| 3.000   |         | 2.948  | 0.411  | 0.000  | 27.32% | 0.000 | 2.000 |
| PHPRB7  | 560.000 | 6.428  | -0.894 | 10.000 | 0.18%  | 4.000 | 5.000 |
| 3.000   |         | 3.239  | 0.521  | 0.000  | 24.64% | 0.000 | 2.000 |
| PHPRB8  | 560.000 | 7.689  | -0.723 | 10.000 | 1.61%  | 4.000 | 6.000 |
| 6.000   |         | 5.775  | -0.084 | 0.000  | 3.04%  | 3.000 | 5.000 |
| PHPRB9  | 560.000 | 8.778  | -1.166 | 10.000 | 14.82% | 7.000 | 9.000 |
| 6.000   |         | 5.714  | -0.026 | 0.000  | 2.86%  | 3.000 | 4.000 |
| PHPRB10 | 560.000 | 8.497  | -1.127 | 10.000 | 14.46% | 7.000 | 9.000 |
| 6.000   |         | 5.911  | -0.128 | 0.000  | 2.86%  | 3.000 | 5.000 |

---

|         |       |        |        |        |       |       |
|---------|-------|--------|--------|--------|-------|-------|
| 560.000 | 8.831 | -1.175 | 10.000 | 16.61% | 7.000 | 9.000 |
|---------|-------|--------|--------|--------|-------|-------|

---

THE MODEL ESTIMATION TERMINATED NORMALLY

WARNING: THE RESIDUAL COVARIANCE MATRIX (THETA) IS NOT POSITIVE DEFINITE.  
 THIS COULD INDICATE A NEGATIVE VARIANCE/RESIDUAL VARIANCE FOR AN OBSERVED  
 VARIABLE, A CORRELATION GREATER OR EQUAL TO ONE BETWEEN TWO OBSERVED  
 VARIABLES, OR A LINEAR DEPENDENCY AMONG MORE THAN TWO OBSERVED VARIABLES.  
 CHECK THE RESULTS SECTION FOR MORE INFORMATION.  
 PROBLEM INVOLVING VARIABLE FPRB7.

MODEL FIT INFORMATION

Number of Free Parameters 274

Loglikelihood

|          |            |
|----------|------------|
| H0 Value | -24114.750 |
| H1 Value | -23874.871 |

Information Criteria

|                          |           |
|--------------------------|-----------|
| Akaike (AIC)             | 48777.500 |
| Bayesian (BIC)           | 49963.355 |
| Sample-Size Adjusted BIC | 49093.545 |
| (n* = (n + 2) / 24)      |           |

Chi-Square Test of Model Fit

|                    |         |
|--------------------|---------|
| Value              | 479.757 |
| Degrees of Freedom | 160     |
| P-Value            | 0.0000  |

RMSEA (Root Mean Square Error Of Approximation)

|                          |             |
|--------------------------|-------------|
| Estimate                 | 0.060       |
| 90 Percent C.I.          | 0.054 0.066 |
| Probability RMSEA <= .05 | 0.005       |

CFI/TLI

|     |       |
|-----|-------|
| CFI | 0.985 |
| TLI | 0.966 |

Chi-Square Test of Model Fit for the Baseline Model

|                    |           |
|--------------------|-----------|
| Value              | 22297.332 |
| Degrees of Freedom | 378       |
| P-Value            | 0.0000    |

SRMR (Standardized Root Mean Square Residual)

|       |       |
|-------|-------|
| Value | 0.127 |
|-------|-------|

MODEL RESULTS

| Estimate | S.E. | Est./S.E. | Two-Tailed<br>P-Value |
|----------|------|-----------|-----------------------|
|----------|------|-----------|-----------------------|

---

---

|         |      |        |       |         |         |
|---------|------|--------|-------|---------|---------|
| PREP    | BY   |        |       |         |         |
| PREP1   |      | 1.000  | 0.000 | 999.000 | 999.000 |
| PREP2   |      | 0.997  | 0.010 | 97.649  | 0.000   |
| PREP3   |      | 1.072  | 0.039 | 27.263  | 0.000   |
| PREP4   |      | 1.100  | 0.040 | 27.493  | 0.000   |
| HELP    | BY   |        |       |         |         |
| HELP1   |      | 1.000  | 0.000 | 999.000 | 999.000 |
| HELP2   |      | 1.020  | 0.013 | 76.332  | 0.000   |
| HELP3   |      | 1.084  | 0.023 | 47.052  | 0.000   |
| HELP4   |      | 1.090  | 0.027 | 40.734  | 0.000   |
| FPRB    | BY   |        |       |         |         |
| FPRB1   |      | 1.000  | 0.000 | 999.000 | 999.000 |
| FPRB2   |      | 1.020  | 0.014 | 73.570  | 0.000   |
| FPRB3   |      | 0.675  | 0.050 | 13.491  | 0.000   |
| FPRB4   |      | 0.684  | 0.051 | 13.391  | 0.000   |
| FPRB5   |      | 0.981  | 0.076 | 12.965  | 0.000   |
| FPRB6   |      | 1.217  | 0.090 | 13.498  | 0.000   |
| FPRB7   |      | 1.374  | 0.101 | 13.540  | 0.000   |
| FPRB8   |      | 0.759  | 0.070 | 10.809  | 0.000   |
| FPRB9   |      | 0.826  | 0.069 | 12.011  | 0.000   |
| FPRB10  |      | 0.719  | 0.090 | 8.023   | 0.000   |
| PHPRB   | BY   |        |       |         |         |
| PHPRB1  |      | 1.000  | 0.000 | 999.000 | 999.000 |
| PHPRB2  |      | 1.109  | 0.052 | 21.281  | 0.000   |
| PHPRB3  |      | 1.454  | 0.116 | 12.584  | 0.000   |
| PHPRB4  |      | 3.066  | 0.410 | 7.484   | 0.000   |
| PHPRB5  |      | 0.937  | 0.085 | 11.005  | 0.000   |
| PHPRB6  |      | 0.844  | 0.104 | 8.133   | 0.000   |
| PHPRB7  |      | 0.517  | 0.107 | 4.835   | 0.000   |
| PHPRB8  |      | -0.390 | 0.104 | -3.760  | 0.000   |
| PHPRB9  |      | -0.378 | 0.098 | -3.854  | 0.000   |
| PHPRB10 |      | -0.351 | 0.096 | -3.678  | 0.000   |
| HELP    | ON   |        |       |         |         |
| PREP    |      | 0.512  | 0.046 | 11.116  | 0.000   |
| PHPRB   | ON   |        |       |         |         |
| PREP    |      | -0.003 | 0.011 | -0.303  | 0.762   |
| FPRB    |      | 0.145  | 0.027 | 5.367   | 0.000   |
| HELP    |      | -0.010 | 0.012 | -0.888  | 0.375   |
| FPRB    | WITH |        |       |         |         |
| HELP    |      | 1.545  | 0.176 | 8.792   | 0.000   |
| PREP    |      | -0.055 | 0.157 | -0.350  | 0.726   |
| FPRB2   | WITH |        |       |         |         |
| FPRB1   |      | 1.038  | 0.178 | 5.828   | 0.000   |
| HELP1   |      | -0.023 | 0.009 | -2.565  | 0.010   |
| FPRB4   | WITH |        |       |         |         |
| FPRB3   |      | 1.828  | 0.132 | 13.849  | 0.000   |
| PREP3   |      | 0.021  | 0.013 | 1.564   | 0.118   |
| PHPRB10 | WITH |        |       |         |         |
| PHPRB9  |      | 7.603  | 0.468 | 16.231  | 0.000   |
| PHPRB8  |      | 7.760  | 0.491 | 15.789  | 0.000   |
| FPRB8   |      | 0.681  | 0.208 | 3.284   | 0.001   |
| PHPRB7  |      | 3.085  | 0.307 | 10.054  | 0.000   |
| PHPRB6  |      | 2.054  | 0.228 | 8.999   | 0.000   |
| FPRB5   |      | 0.670  | 0.239 | 2.800   | 0.005   |

---

---

|             |        |       |        |       |
|-------------|--------|-------|--------|-------|
| PHPRB3      | -0.082 | 0.034 | -2.425 | 0.015 |
| HELP4       | -0.060 | 0.040 | -1.517 | 0.129 |
| FPRB6       | 1.585  | 0.262 | 6.052  | 0.000 |
| FPRB9       | 0.289  | 0.104 | 2.772  | 0.006 |
| PHPRB2      | -0.034 | 0.023 | -1.498 | 0.134 |
| PREP3       | 0.251  | 0.066 | 3.824  | 0.000 |
| FPRB2       | 0.241  | 0.077 | 3.140  | 0.002 |
| FPRB1       | 0.216  | 0.077 | 2.814  | 0.005 |
| PHPRB7 WITH |        |       |        |       |
| PHPRB6      | 4.611  | 0.260 | 17.703 | 0.000 |
| PHPRB5      | 1.899  | 0.182 | 10.419 | 0.000 |
| FPRB9       | 2.515  | 0.240 | 10.468 | 0.000 |
| PHPRB4      | -0.285 | 0.236 | -1.209 | 0.227 |
| FPRB10      | 1.707  | 0.224 | 7.632  | 0.000 |
| FPRB5       | 1.139  | 0.201 | 5.661  | 0.000 |
| FPRB8       | 2.166  | 0.240 | 9.015  | 0.000 |
| PHPRB1      | -0.079 | 0.026 | -2.987 | 0.003 |
| PREP4       | 0.677  | 0.097 | 7.006  | 0.000 |
| PREP3       | 0.676  | 0.091 | 7.403  | 0.000 |
| FPRB7       | 1.171  | 0.263 | 4.453  | 0.000 |
| HELP4       | 0.639  | 0.117 | 5.436  | 0.000 |
| HELP3       | 0.502  | 0.111 | 4.533  | 0.000 |
| FPRB6       | 0.618  | 0.241 | 2.568  | 0.010 |
| PREP4 WITH  |        |       |        |       |
| PREP3       | 0.412  | 0.158 | 2.610  | 0.009 |
| HELP2 WITH  |        |       |        |       |
| HELP1       | 1.001  | 0.074 | 13.464 | 0.000 |
| PREP1       | 0.389  | 0.045 | 8.600  | 0.000 |
| PREP2       | 0.329  | 0.043 | 7.727  | 0.000 |
| PHPRB2 WITH |        |       |        |       |
| PHPRB1      | 0.469  | 0.062 | 7.514  | 0.000 |
| FPRB2       | -0.105 | 0.034 | -3.046 | 0.002 |
| FPRB9       | -0.073 | 0.019 | -3.797 | 0.000 |
| FPRB7       | -0.223 | 0.098 | -2.268 | 0.023 |
| PREP4       | 0.068  | 0.031 | 2.183  | 0.029 |
| HELP2       | -0.014 | 0.009 | -1.573 | 0.116 |
| PREP2       | 0.016  | 0.019 | 0.860  | 0.390 |
| FPRB6       | -0.124 | 0.047 | -2.651 | 0.008 |
| PREP3       | 0.050  | 0.031 | 1.622  | 0.105 |
| FPRB1       | -0.071 | 0.034 | -2.053 | 0.040 |
| FPRB9 WITH  |        |       |        |       |
| FPRB8       | 3.958  | 0.303 | 13.082 | 0.000 |
| FPRB5       | 1.714  | 0.222 | 7.704  | 0.000 |
| PREP2       | -0.439 | 0.080 | -5.472 | 0.000 |
| PREP1       | -0.509 | 0.083 | -6.103 | 0.000 |
| FPRB7       | 2.747  | 0.336 | 8.180  | 0.000 |
| HELP4       | 0.750  | 0.117 | 6.429  | 0.000 |
| HELP3       | 0.645  | 0.110 | 5.854  | 0.000 |
| FPRB6       | 1.462  | 0.275 | 5.316  | 0.000 |
| FPRB10 WITH |        |       |        |       |
| FPRB9       | 3.975  | 0.310 | 12.801 | 0.000 |
| FPRB8       | 3.275  | 0.289 | 11.346 | 0.000 |
| HELP3       | 0.431  | 0.104 | 4.130  | 0.000 |
| FPRB3       | 0.515  | 0.135 | 3.812  | 0.000 |
| FPRB5       | 1.831  | 0.273 | 6.699  | 0.000 |
| FPRB4       | 0.469  | 0.138 | 3.409  | 0.001 |
| FPRB2       | 0.397  | 0.198 | 2.006  | 0.045 |
| FPRB7       | 3.065  | 0.393 | 7.792  | 0.000 |

---

---

|             |        |       |        |       |
|-------------|--------|-------|--------|-------|
| FPRB6       | 1.860  | 0.341 | 5.458  | 0.000 |
| FPRB1       | 0.443  | 0.196 | 2.261  | 0.024 |
| HELP4       | 0.603  | 0.112 | 5.385  | 0.000 |
| PREP1       | -0.374 | 0.079 | -4.714 | 0.000 |
| PREP2       | -0.288 | 0.076 | -3.790 | 0.000 |
| PHPRB5 WITH |        |       |        |       |
| PHPRB4      | -0.301 | 0.247 | -1.216 | 0.224 |
| FPRB3       | 0.767  | 0.099 | 7.761  | 0.000 |
| FPRB9       | 1.997  | 0.181 | 11.035 | 0.000 |
| FPRB4       | 0.708  | 0.101 | 7.035  | 0.000 |
| FPRB10      | 2.102  | 0.181 | 11.613 | 0.000 |
| FPRB8       | 1.655  | 0.179 | 9.266  | 0.000 |
| FPRB5       | 1.331  | 0.162 | 8.236  | 0.000 |
| FPRB6       | 1.200  | 0.200 | 6.003  | 0.000 |
| FPRB7       | 1.785  | 0.223 | 8.016  | 0.000 |
| PREP2       | -0.385 | 0.059 | -6.493 | 0.000 |
| PREP1       | -0.382 | 0.061 | -6.306 | 0.000 |
| FPRB1       | 0.732  | 0.121 | 6.070  | 0.000 |
| FPRB2       | 0.691  | 0.120 | 5.781  | 0.000 |
| HELP4       | 0.490  | 0.086 | 5.698  | 0.000 |
| HELP3       | 0.357  | 0.081 | 4.393  | 0.000 |
| PHPRB6 WITH |        |       |        |       |
| PHPRB5      | 2.221  | 0.173 | 12.817 | 0.000 |
| FPRB9       | 2.834  | 0.225 | 12.616 | 0.000 |
| PHPRB4      | -0.560 | 0.286 | -1.957 | 0.050 |
| FPRB2       | 0.463  | 0.091 | 5.113  | 0.000 |
| FPRB10      | 2.157  | 0.210 | 10.286 | 0.000 |
| FPRB8       | 2.059  | 0.215 | 9.596  | 0.000 |
| PREP4       | 0.745  | 0.087 | 8.516  | 0.000 |
| PREP3       | 0.701  | 0.082 | 8.531  | 0.000 |
| FPRB5       | 1.112  | 0.175 | 6.364  | 0.000 |
| FPRB1       | 0.407  | 0.090 | 4.514  | 0.000 |
| FPRB6       | 1.014  | 0.219 | 4.621  | 0.000 |
| FPRB7       | 1.622  | 0.253 | 6.415  | 0.000 |
| HELP4       | 0.713  | 0.109 | 6.526  | 0.000 |
| HELP3       | 0.527  | 0.103 | 5.118  | 0.000 |
| PHPRB3      | -0.069 | 0.048 | -1.445 | 0.148 |
| FPRB7 WITH  |        |       |        |       |
| FPRB5       | 0.929  | 0.277 | 3.351  | 0.001 |
| FPRB2       | -0.012 | 0.203 | -0.059 | 0.953 |
| FPRB1       | 0.039  | 0.200 | 0.194  | 0.846 |
| PREP2       | -0.400 | 0.173 | -2.310 | 0.021 |
| PREP1       | -0.499 | 0.174 | -2.868 | 0.004 |
| HELP3       | 0.214  | 0.124 | 1.726  | 0.084 |
| PREP4       | -0.650 | 0.181 | -3.589 | 0.000 |
| PREP3       | -0.585 | 0.178 | -3.293 | 0.001 |
| FPRB6       | 2.211  | 0.381 | 5.810  | 0.000 |
| HELP4       | 0.373  | 0.132 | 2.813  | 0.005 |
| PREP3 WITH  |        |       |        |       |
| PREP2       | 0.083  | 0.013 | 6.345  | 0.000 |
| PHPRB8 WITH |        |       |        |       |
| PHPRB7      | 3.126  | 0.320 | 9.769  | 0.000 |
| PHPRB6      | 1.777  | 0.238 | 7.454  | 0.000 |
| FPRB6       | 1.205  | 0.277 | 4.348  | 0.000 |
| PHPRB5      | -0.154 | 0.082 | -1.877 | 0.060 |
| FPRB8       | 0.970  | 0.209 | 4.637  | 0.000 |
| FPRB10      | -0.464 | 0.102 | -4.567 | 0.000 |
| PREP4       | -0.387 | 0.073 | -5.267 | 0.000 |
| HELP2       | -0.049 | 0.023 | -2.117 | 0.034 |

---

---

|             |        |       |        |       |
|-------------|--------|-------|--------|-------|
| PREP1       | -0.275 | 0.070 | -3.923 | 0.000 |
| FPRB7       | -0.265 | 0.128 | -2.066 | 0.039 |
| PREP2       | -0.247 | 0.069 | -3.564 | 0.000 |
| FPRB5       | 0.724  | 0.250 | 2.894  | 0.004 |
| PHPRB9 WITH |        |       |        |       |
| FPRB8       | 1.088  | 0.208 | 5.217  | 0.000 |
| PHPRB8      | 7.881  | 0.491 | 16.037 | 0.000 |
| PREP3       | 0.319  | 0.065 | 4.887  | 0.000 |
| PHPRB7      | 3.149  | 0.301 | 10.446 | 0.000 |
| PHPRB6      | 2.016  | 0.225 | 8.976  | 0.000 |
| FPRB6       | 1.477  | 0.257 | 5.750  | 0.000 |
| FPRB9       | 0.342  | 0.099 | 3.464  | 0.001 |
| FPRB5       | 0.791  | 0.236 | 3.359  | 0.001 |
| HELP1 WITH  |        |       |        |       |
| PREP1       | 0.410  | 0.047 | 8.772  | 0.000 |
| PREP2       | 0.319  | 0.044 | 7.303  | 0.000 |
| PHPRB3 WITH |        |       |        |       |
| PHPRB2      | -0.014 | 0.048 | -0.292 | 0.771 |
| FPRB6       | -0.330 | 0.080 | -4.141 | 0.000 |
| FPRB7       | -0.245 | 0.104 | -2.354 | 0.019 |
| FPRB5       | -0.107 | 0.054 | -2.004 | 0.045 |
| PREP2       | -0.002 | 0.031 | -0.063 | 0.950 |
| PREP1       | -0.021 | 0.031 | -0.670 | 0.503 |
| FPRB2       | -0.184 | 0.059 | -3.096 | 0.002 |
| FPRB1       | -0.164 | 0.059 | -2.769 | 0.006 |
| PHPRB4 WITH |        |       |        |       |
| PREP3       | -0.083 | 0.046 | -1.790 | 0.073 |
| PREP4       | -0.033 | 0.049 | -0.673 | 0.501 |
| HELP3       | 0.011  | 0.054 | 0.196  | 0.845 |
| FPRB8       | 0.063  | 0.100 | 0.624  | 0.532 |
| FPRB10      | 0.458  | 0.110 | 4.173  | 0.000 |
| FPRB9       | 0.201  | 0.102 | 1.976  | 0.048 |
| PHPRB3      | -1.968 | 0.414 | -4.758 | 0.000 |
| HELP2       | 0.020  | 0.018 | 1.064  | 0.288 |
| PHPRB2      | -1.453 | 0.318 | -4.565 | 0.000 |
| PHPRB1      | -1.241 | 0.276 | -4.490 | 0.000 |
| FPRB7       | 0.105  | 0.174 | 0.605  | 0.545 |
| FPRB6       | -0.172 | 0.128 | -1.341 | 0.180 |
| HELP4       | 0.144  | 0.058 | 2.502  | 0.012 |
| FPRB2       | -0.204 | 0.100 | -2.034 | 0.042 |
| FPRB1       | -0.162 | 0.100 | -1.630 | 0.103 |
| FPRB8 WITH  |        |       |        |       |
| FPRB5       | 2.034  | 0.228 | 8.933  | 0.000 |
| FPRB4       | -0.049 | 0.032 | -1.561 | 0.119 |
| PREP3       | -0.280 | 0.130 | -2.164 | 0.030 |
| FPRB7       | 2.624  | 0.330 | 7.948  | 0.000 |
| HELP4       | 0.644  | 0.118 | 5.469  | 0.000 |
| HELP3       | 0.598  | 0.111 | 5.402  | 0.000 |
| FPRB6       | 1.544  | 0.269 | 5.737  | 0.000 |
| PREP1       | -0.734 | 0.138 | -5.334 | 0.000 |
| PREP2       | -0.652 | 0.136 | -4.799 | 0.000 |
| PREP4       | -0.402 | 0.137 | -2.940 | 0.003 |
| FPRB5 WITH  |        |       |        |       |
| FPRB4       | 0.559  | 0.127 | 4.406  | 0.000 |
| HELP3       | 0.065  | 0.095 | 0.684  | 0.494 |
| FPRB3       | 0.476  | 0.123 | 3.876  | 0.000 |
| PREP3       | 0.264  | 0.077 | 3.441  | 0.001 |
| PREP4       | 0.161  | 0.086 | 1.875  | 0.061 |

---

---

|                    |      |        |       |        |       |
|--------------------|------|--------|-------|--------|-------|
| HELP4              |      | 0.237  | 0.101 | 2.347  | 0.019 |
| PREP1              |      | -0.081 | 0.037 | -2.165 | 0.030 |
| PREP2              | WITH |        |       |        |       |
| PREP1              |      | 0.329  | 0.133 | 2.482  | 0.013 |
| PHPRB1             | WITH |        |       |        |       |
| PREP1              |      | -0.002 | 0.025 | -0.082 | 0.934 |
| FPRB7              |      | -0.019 | 0.090 | -0.216 | 0.829 |
| PREP2              |      | -0.004 | 0.027 | -0.130 | 0.897 |
| HELP3              |      | -0.019 | 0.014 | -1.406 | 0.160 |
| FPRB5              |      | 0.060  | 0.033 | 1.816  | 0.069 |
| HELP4              | WITH |        |       |        |       |
| HELP2              |      | -0.157 | 0.061 | -2.582 | 0.010 |
| HELP3              | WITH |        |       |        |       |
| HELP1              |      | 0.123  | 0.060 | 2.051  | 0.040 |
| FPRB6              | WITH |        |       |        |       |
| PREP2              |      | 0.283  | 0.089 | 3.165  | 0.002 |
| PREP1              |      | 0.188  | 0.089 | 2.110  | 0.035 |
| HELP3              |      | 0.032  | 0.111 | 0.286  | 0.775 |
| HELP4              |      | 0.115  | 0.118 | 0.976  | 0.329 |
| PREP3              |      | 0.129  | 0.059 | 2.205  | 0.027 |
| FPRB5              |      | 1.318  | 0.246 | 5.347  | 0.000 |
| Intercepts         |      |        |       |        |       |
| PREP1              |      | 2.721  | 0.091 | 29.771 | 0.000 |
| PREP2              |      | 2.771  | 0.091 | 30.444 | 0.000 |
| PREP3              |      | 3.064  | 0.099 | 30.940 | 0.000 |
| PREP4              |      | 3.013  | 0.102 | 29.667 | 0.000 |
| HELP1              |      | 3.727  | 0.110 | 34.013 | 0.000 |
| HELP2              |      | 3.752  | 0.108 | 34.609 | 0.000 |
| HELP3              |      | 4.043  | 0.110 | 36.727 | 0.000 |
| HELP4              |      | 4.116  | 0.110 | 37.482 | 0.000 |
| FPRB1              |      | 2.159  | 0.084 | 25.567 | 0.000 |
| FPRB2              |      | 2.180  | 0.085 | 25.730 | 0.000 |
| FPRB3              |      | 1.496  | 0.076 | 19.773 | 0.000 |
| FPRB4              |      | 1.466  | 0.077 | 18.929 | 0.000 |
| FPRB5              |      | 2.677  | 0.108 | 24.863 | 0.000 |
| FPRB6              |      | 3.577  | 0.125 | 28.726 | 0.000 |
| FPRB7              |      | 2.973  | 0.138 | 21.517 | 0.000 |
| FPRB8              |      | 3.375  | 0.111 | 30.330 | 0.000 |
| FPRB9              |      | 3.159  | 0.110 | 28.708 | 0.000 |
| FPRB10             |      | 2.870  | 0.107 | 26.828 | 0.000 |
| PHPRB1             |      | 0.446  | 0.048 | 9.310  | 0.000 |
| PHPRB2             |      | 0.445  | 0.051 | 8.667  | 0.000 |
| PHPRB3             |      | 0.561  | 0.051 | 11.028 | 0.000 |
| PHPRB4             |      | 0.852  | 0.064 | 13.370 | 0.000 |
| PHPRB5             |      | 1.436  | 0.080 | 17.858 | 0.000 |
| PHPRB6             |      | 2.948  | 0.098 | 29.947 | 0.000 |
| PHPRB7             |      | 3.239  | 0.108 | 29.890 | 0.000 |
| PHPRB8             |      | 5.775  | 0.129 | 44.698 | 0.000 |
| PHPRB9             |      | 5.714  | 0.122 | 46.653 | 0.000 |
| PHPRB10            |      | 5.911  | 0.124 | 47.594 | 0.000 |
| Variances          |      |        |       |        |       |
| PREP               |      | 4.234  | 0.300 | 14.133 | 0.000 |
| FPRB               |      | 2.807  | 0.276 | 10.185 | 0.000 |
| Residual Variances |      |        |       |        |       |
| PREP1              |      | 0.446  | 0.135 | 3.311  | 0.001 |
| PREP2              |      | 0.429  | 0.133 | 3.222  | 0.001 |

---



---

|         |        |       |        |       |
|---------|--------|-------|--------|-------|
| PREP3   | 0.628  | 0.155 | 4.044  | 0.000 |
| PREP4   | 0.650  | 0.165 | 3.943  | 0.000 |
| HELP1   | 1.293  | 0.098 | 13.172 | 0.000 |
| HELP2   | 0.937  | 0.091 | 10.264 | 0.000 |
| HELP3   | 0.410  | 0.074 | 5.512  | 0.000 |
| HELP4   | 0.299  | 0.079 | 3.799  | 0.000 |
| FPRB1   | 1.186  | 0.180 | 6.592  | 0.000 |
| FPRB2   | 1.102  | 0.182 | 6.070  | 0.000 |
| FPRB3   | 1.927  | 0.133 | 14.498 | 0.000 |
| FPRB4   | 2.045  | 0.140 | 14.630 | 0.000 |
| FPRB5   | 3.789  | 0.275 | 13.754 | 0.000 |
| FPRB6   | 4.526  | 0.371 | 12.189 | 0.000 |
| FPRB7   | 5.394  | 0.598 | 9.026  | 0.000 |
| FPRB8   | 5.317  | 0.347 | 15.323 | 0.000 |
| FPRB9   | 4.863  | 0.324 | 15.019 | 0.000 |
| FPRB10  | 4.955  | 0.394 | 12.585 | 0.000 |
| PHPRB1  | 0.570  | 0.061 | 9.337  | 0.000 |
| PHPRB2  | 0.592  | 0.085 | 6.995  | 0.000 |
| PHPRB3  | -0.070 | 0.106 | -0.659 | 0.510 |
| PHPRB4  | -4.476 | 1.585 | -2.824 | 0.005 |
| PHPRB5  | 2.990  | 0.176 | 16.957 | 0.000 |
| PHPRB6  | 4.915  | 0.258 | 19.084 | 0.000 |
| PHPRB7  | 6.385  | 0.327 | 19.508 | 0.000 |
| PHPRB8  | 9.239  | 0.559 | 16.526 | 0.000 |
| PHPRB9  | 8.299  | 0.484 | 17.147 | 0.000 |
| PHPRB10 | 8.548  | 0.499 | 17.116 | 0.000 |
| HELP    | 4.320  | 0.307 | 14.089 | 0.000 |
| PHPRB   | 0.662  | 0.079 | 8.391  | 0.000 |

## STANDARDIZED MODEL RESULTS

## STDYX Standardization

|        | Estimate | S.E.  | Est./S.E. | Two-Tailed<br>P-Value |
|--------|----------|-------|-----------|-----------------------|
| PREP   |          |       |           |                       |
| BY     |          |       |           |                       |
| PREP1  | 0.951    | 0.015 | 62.196    | 0.000                 |
| PREP2  | 0.953    | 0.015 | 62.548    | 0.000                 |
| PREP3  | 0.941    | 0.015 | 61.297    | 0.000                 |
| PREP4  | 0.942    | 0.015 | 60.939    | 0.000                 |
| HELP   |          |       |           |                       |
| BY     |          |       |           |                       |
| HELP1  | 0.899    | 0.010 | 93.792    | 0.000                 |
| HELP2  | 0.926    | 0.008 | 110.755   | 0.000                 |
| HELP3  | 0.969    | 0.006 | 163.350   | 0.000                 |
| HELP4  | 0.978    | 0.006 | 159.332   | 0.000                 |
| FPRB   |          |       |           |                       |
| BY     |          |       |           |                       |
| FPRB1  | 0.838    | 0.028 | 30.338    | 0.000                 |
| FPRB2  | 0.852    | 0.027 | 31.334    | 0.000                 |
| FPRB3  | 0.632    | 0.030 | 21.065    | 0.000                 |
| FPRB4  | 0.626    | 0.030 | 20.695    | 0.000                 |
| FPRB5  | 0.645    | 0.031 | 20.577    | 0.000                 |
| FPRB6  | 0.692    | 0.030 | 22.954    | 0.000                 |
| FPRB7  | 0.704    | 0.038 | 18.324    | 0.000                 |
| FPRB8  | 0.483    | 0.036 | 13.593    | 0.000                 |
| FPRB9  | 0.532    | 0.033 | 16.316    | 0.000                 |
| FPRB10 | 0.476    | 0.053 | 8.905     | 0.000                 |
| PHPRB  |          |       |           |                       |
| BY     |          |       |           |                       |
| PHPRB1 | 0.747    | 0.032 | 23.174    | 0.000                 |

---

|         |      |         |         |         |         |
|---------|------|---------|---------|---------|---------|
| PHPRB2  |      | 0.774   | 0.038   | 20.583  | 0.000   |
| PHPRB3  |      | 1.024   | 0.036   | 28.635  | 0.000   |
| PHPRB4  |      | 1.723   | 0.208   | 8.291   | 0.000   |
| PHPRB5  |      | 0.417   | 0.035   | 11.940  | 0.000   |
| PHPRB6  |      | 0.307   | 0.035   | 8.831   | 0.000   |
| PHPRB7  |      | 0.171   | 0.035   | 4.943   | 0.000   |
| PHPRB8  |      | -0.108  | 0.028   | -3.895  | 0.000   |
| PHPRB9  |      | -0.110  | 0.028   | -4.004  | 0.000   |
| PHPRB10 |      | -0.101  | 0.027   | -3.813  | 0.000   |
| HELP    | ON   |         |         |         |         |
| PREP    |      | 0.452   | 0.035   | 13.011  | 0.000   |
| PHPRB   | ON   |         |         |         |         |
| PREP    |      | -0.008  | 0.028   | -0.303  | 0.762   |
| FPRB    |      | 0.287   | 0.048   | 5.987   | 0.000   |
| HELP    |      | -0.029  | 0.032   | -0.886  | 0.376   |
| FPRB    | WITH |         |         |         |         |
| HELP    |      | 0.444   | 0.037   | 12.140  | 0.000   |
| PREP    |      | -0.016  | 0.045   | -0.351  | 0.726   |
| FPRB2   | WITH |         |         |         |         |
| FPRB1   |      | 0.908   | 0.015   | 59.870  | 0.000   |
| HELP1   |      | -0.019  | 0.008   | -2.509  | 0.012   |
| FPRB4   | WITH |         |         |         |         |
| FPRB3   |      | 0.921   | 0.007   | 133.199 | 0.000   |
| PREP3   |      | 0.019   | 0.012   | 1.531   | 0.126   |
| PHPRB10 | WITH |         |         |         |         |
| PHPRB9  |      | 0.903   | 0.008   | 116.597 | 0.000   |
| PHPRB8  |      | 0.873   | 0.010   | 90.250  | 0.000   |
| FPRB8   |      | 0.101   | 0.031   | 3.278   | 0.001   |
| PHPRB7  |      | 0.418   | 0.033   | 12.608  | 0.000   |
| PHPRB6  |      | 0.317   | 0.031   | 10.109  | 0.000   |
| FPRB5   |      | 0.118   | 0.042   | 2.819   | 0.005   |
| PHPRB3  |      | 999.000 | 999.000 | 999.000 | 999.000 |
| HELP4   |      | -0.038  | 0.025   | -1.518  | 0.129   |
| FPRB6   |      | 0.255   | 0.041   | 6.216   | 0.000   |
| FPRB9   |      | 0.045   | 0.016   | 2.754   | 0.006   |
| PHPRB2  |      | -0.015  | 0.010   | -1.491  | 0.136   |
| PREP3   |      | 0.108   | 0.030   | 3.567   | 0.000   |
| FPRB2   |      | 0.078   | 0.025   | 3.110   | 0.002   |
| FPRB1   |      | 0.068   | 0.024   | 2.801   | 0.005   |
| PHPRB7  | WITH |         |         |         |         |
| PHPRB6  |      | 0.823   | 0.013   | 61.363  | 0.000   |
| PHPRB5  |      | 0.435   | 0.031   | 13.905  | 0.000   |
| FPRB9   |      | 0.451   | 0.033   | 13.547  | 0.000   |
| PHPRB4  |      | 999.000 | 999.000 | 999.000 | 999.000 |
| FPRB10  |      | 0.303   | 0.036   | 8.410   | 0.000   |
| FPRB5   |      | 0.232   | 0.039   | 5.945   | 0.000   |
| FPRB8   |      | 0.372   | 0.035   | 10.563  | 0.000   |
| PHPRB1  |      | -0.041  | 0.014   | -2.986  | 0.003   |
| PREP4   |      | 0.332   | 0.062   | 5.371   | 0.000   |
| PREP3   |      | 0.338   | 0.060   | 5.610   | 0.000   |
| FPRB7   |      | 0.199   | 0.043   | 4.656   | 0.000   |
| HELP4   |      | 0.462   | 0.098   | 4.696   | 0.000   |
| HELP3   |      | 0.310   | 0.073   | 4.271   | 0.000   |
| FPRB6   |      | 0.115   | 0.045   | 2.571   | 0.010   |
| PREP4   | WITH |         |         |         |         |
| PREP3   |      | 0.644   | 0.089   | 7.219   | 0.000   |

---

---

|        |      |         |         |         |         |
|--------|------|---------|---------|---------|---------|
| HELP2  | WITH |         |         |         |         |
| HELP1  |      | 0.910   | 0.011   | 79.273  | 0.000   |
| PREP1  |      | 0.601   | 0.098   | 6.166   | 0.000   |
| PREP2  |      | 0.518   | 0.090   | 5.790   | 0.000   |
| PHPRB2 | WITH |         |         |         |         |
| PHPRB1 |      | 0.809   | 0.023   | 35.718  | 0.000   |
| FPRB2  |      | -0.130  | 0.047   | -2.778  | 0.005   |
| FPRB9  |      | -0.043  | 0.011   | -3.727  | 0.000   |
| FPRB7  |      | -0.125  | 0.058   | -2.158  | 0.031   |
| PREP4  |      | 0.110   | 0.054   | 2.044   | 0.041   |
| HELP2  |      | -0.018  | 0.012   | -1.550  | 0.121   |
| PREP2  |      | 0.032   | 0.037   | 0.852   | 0.394   |
| FPRB6  |      | -0.076  | 0.030   | -2.505  | 0.012   |
| PREP3  |      | 0.081   | 0.052   | 1.559   | 0.119   |
| FPRB1  |      | -0.084  | 0.043   | -1.938  | 0.053   |
| FPRB9  | WITH |         |         |         |         |
| FPRB8  |      | 0.778   | 0.018   | 43.837  | 0.000   |
| FPRB5  |      | 0.399   | 0.038   | 10.539  | 0.000   |
| PREP2  |      | -0.304  | 0.063   | -4.795  | 0.000   |
| PREP1  |      | -0.346  | 0.067   | -5.183  | 0.000   |
| FPRB7  |      | 0.536   | 0.035   | 15.275  | 0.000   |
| HELP4  |      | 0.621   | 0.113   | 5.480   | 0.000   |
| HELP3  |      | 0.456   | 0.080   | 5.701   | 0.000   |
| FPRB6  |      | 0.312   | 0.047   | 6.622   | 0.000   |
| FPRB10 | WITH |         |         |         |         |
| FPRB9  |      | 0.810   | 0.017   | 48.794  | 0.000   |
| FPRB8  |      | 0.638   | 0.026   | 24.713  | 0.000   |
| HELP3  |      | 0.302   | 0.074   | 4.074   | 0.000   |
| FPRB3  |      | 0.167   | 0.040   | 4.214   | 0.000   |
| FPRB5  |      | 0.423   | 0.047   | 9.040   | 0.000   |
| FPRB4  |      | 0.147   | 0.040   | 3.719   | 0.000   |
| FPRB2  |      | 0.170   | 0.081   | 2.090   | 0.037   |
| FPRB7  |      | 0.593   | 0.044   | 13.349  | 0.000   |
| FPRB6  |      | 0.393   | 0.056   | 7.058   | 0.000   |
| FPRB1  |      | 0.183   | 0.077   | 2.374   | 0.018   |
| HELP4  |      | 0.495   | 0.101   | 4.905   | 0.000   |
| PREP1  |      | -0.252  | 0.060   | -4.179  | 0.000   |
| PREP2  |      | -0.198  | 0.057   | -3.500  | 0.000   |
| PHPRB5 | WITH |         |         |         |         |
| PHPRB4 |      | 999.000 | 999.000 | 999.000 | 999.000 |
| FPRB3  |      | 0.320   | 0.039   | 8.245   | 0.000   |
| FPRB9  |      | 0.524   | 0.037   | 14.057  | 0.000   |
| FPRB4  |      | 0.286   | 0.039   | 7.366   | 0.000   |
| FPRB10 |      | 0.546   | 0.036   | 15.221  | 0.000   |
| FPRB8  |      | 0.415   | 0.038   | 10.835  | 0.000   |
| FPRB5  |      | 0.396   | 0.045   | 8.729   | 0.000   |
| FPRB6  |      | 0.326   | 0.053   | 6.162   | 0.000   |
| FPRB7  |      | 0.445   | 0.052   | 8.591   | 0.000   |
| PREP2  |      | -0.340  | 0.071   | -4.820  | 0.000   |
| PREP1  |      | -0.331  | 0.069   | -4.794  | 0.000   |
| FPRB1  |      | 0.389   | 0.071   | 5.476   | 0.000   |
| FPRB2  |      | 0.381   | 0.074   | 5.147   | 0.000   |
| HELP4  |      | 0.518   | 0.106   | 4.875   | 0.000   |
| HELP3  |      | 0.322   | 0.078   | 4.126   | 0.000   |
| PHPRB6 | WITH |         |         |         |         |
| PHPRB5 |      | 0.579   | 0.026   | 22.557  | 0.000   |
| FPRB9  |      | 0.580   | 0.031   | 18.883  | 0.000   |
| PHPRB4 |      | 999.000 | 999.000 | 999.000 | 999.000 |

---

|             |         |         |         |         |
|-------------|---------|---------|---------|---------|
| FPRB2       | 0.199   | 0.041   | 4.892   | 0.000   |
| FPRB10      | 0.437   | 0.034   | 12.774  | 0.000   |
| FPRB8       | 0.403   | 0.035   | 11.409  | 0.000   |
| PREP4       | 0.417   | 0.068   | 6.163   | 0.000   |
| PREP3       | 0.399   | 0.064   | 6.238   | 0.000   |
| FPRB5       | 0.258   | 0.039   | 6.563   | 0.000   |
| FPRB1       | 0.169   | 0.039   | 4.367   | 0.000   |
| FPRB6       | 0.215   | 0.046   | 4.692   | 0.000   |
| FPRB7       | 0.315   | 0.044   | 7.104   | 0.000   |
| HELP4       | 0.588   | 0.110   | 5.349   | 0.000   |
| HELP3       | 0.371   | 0.079   | 4.696   | 0.000   |
| PHPRB3      | 999.000 | 999.000 | 999.000 | 999.000 |
| FPRB7 WITH  |         |         |         |         |
| FPRB5       | 0.206   | 0.052   | 3.952   | 0.000   |
| FPRB2       | -0.005  | 0.084   | -0.059  | 0.953   |
| FPRB1       | 0.015   | 0.078   | 0.197   | 0.844   |
| PREP2       | -0.263  | 0.119   | -2.219  | 0.026   |
| PREP1       | -0.322  | 0.119   | -2.707  | 0.007   |
| HELP3       | 0.144   | 0.082   | 1.764   | 0.078   |
| PREP4       | -0.347  | 0.100   | -3.467  | 0.001   |
| PREP3       | -0.318  | 0.098   | -3.230  | 0.001   |
| FPRB6       | 0.448   | 0.048   | 9.285   | 0.000   |
| HELP4       | 0.293   | 0.103   | 2.857   | 0.004   |
| PREP3 WITH  |         |         |         |         |
| PREP2       | 0.159   | 0.023   | 6.833   | 0.000   |
| PHPRB8 WITH |         |         |         |         |
| PHPRB7      | 0.407   | 0.033   | 12.222  | 0.000   |
| PHPRB6      | 0.264   | 0.033   | 8.061   | 0.000   |
| FPRB6       | 0.186   | 0.042   | 4.400   | 0.000   |
| PHPRB5      | -0.029  | 0.016   | -1.890  | 0.059   |
| FPRB8       | 0.138   | 0.029   | 4.760   | 0.000   |
| FPRB10      | -0.069  | 0.014   | -4.751  | 0.000   |
| PREP4       | -0.158  | 0.034   | -4.597  | 0.000   |
| HELP2       | -0.017  | 0.008   | -2.093  | 0.036   |
| PREP1       | -0.136  | 0.039   | -3.496  | 0.000   |
| FPRB7       | -0.038  | 0.018   | -2.093  | 0.036   |
| PREP2       | -0.124  | 0.038   | -3.225  | 0.001   |
| FPRB5       | 0.122   | 0.042   | 2.936   | 0.003   |
| PHPRB9 WITH |         |         |         |         |
| FPRB8       | 0.164   | 0.031   | 5.326   | 0.000   |
| PHPRB8      | 0.900   | 0.008   | 116.384 | 0.000   |
| PREP3       | 0.140   | 0.032   | 4.303   | 0.000   |
| PHPRB7      | 0.433   | 0.033   | 13.243  | 0.000   |
| PHPRB6      | 0.316   | 0.031   | 10.026  | 0.000   |
| FPRB6       | 0.241   | 0.041   | 5.943   | 0.000   |
| FPRB9       | 0.054   | 0.016   | 3.451   | 0.001   |
| FPRB5       | 0.141   | 0.041   | 3.413   | 0.001   |
| HELP1 WITH  |         |         |         |         |
| PREP1       | 0.541   | 0.089   | 6.074   | 0.000   |
| PREP2       | 0.428   | 0.078   | 5.471   | 0.000   |
| PHPRB3 WITH |         |         |         |         |
| PHPRB2      | 999.000 | 999.000 | 999.000 | 999.000 |
| FPRB6       | 999.000 | 999.000 | 999.000 | 999.000 |
| FPRB7       | 999.000 | 999.000 | 999.000 | 999.000 |
| FPRB5       | 999.000 | 999.000 | 999.000 | 999.000 |
| PREP2       | 999.000 | 999.000 | 999.000 | 999.000 |
| PREP1       | 999.000 | 999.000 | 999.000 | 999.000 |
| FPRB2       | 999.000 | 999.000 | 999.000 | 999.000 |

|        |      |         |         |         |         |
|--------|------|---------|---------|---------|---------|
| FPRB1  |      | 999.000 | 999.000 | 999.000 | 999.000 |
| PHPRB4 | WITH |         |         |         |         |
| PREP3  |      | 999.000 | 999.000 | 999.000 | 999.000 |
| PREP4  |      | 999.000 | 999.000 | 999.000 | 999.000 |
| HELP3  |      | 999.000 | 999.000 | 999.000 | 999.000 |
| FPRB8  |      | 999.000 | 999.000 | 999.000 | 999.000 |
| FPRB10 |      | 999.000 | 999.000 | 999.000 | 999.000 |
| FPRB9  |      | 999.000 | 999.000 | 999.000 | 999.000 |
| PHPRB3 |      | 999.000 | 999.000 | 999.000 | 999.000 |
| HELP2  |      | 999.000 | 999.000 | 999.000 | 999.000 |
| PHPRB2 |      | 999.000 | 999.000 | 999.000 | 999.000 |
| PHPRB1 |      | 999.000 | 999.000 | 999.000 | 999.000 |
| FPRB7  |      | 999.000 | 999.000 | 999.000 | 999.000 |
| FPRB6  |      | 999.000 | 999.000 | 999.000 | 999.000 |
| HELP4  |      | 999.000 | 999.000 | 999.000 | 999.000 |
| FPRB2  |      | 999.000 | 999.000 | 999.000 | 999.000 |
| FPRB1  |      | 999.000 | 999.000 | 999.000 | 999.000 |
| FPRB8  | WITH |         |         |         |         |
| FPRB5  |      | 0.453   | 0.035   | 13.118  | 0.000   |
| FPRB4  |      | -0.015  | 0.010   | -1.559  | 0.119   |
| PREP3  |      | -0.153  | 0.071   | -2.150  | 0.032   |
| FPRB7  |      | 0.490   | 0.037   | 13.368  | 0.000   |
| HELP4  |      | 0.511   | 0.106   | 4.818   | 0.000   |
| HELP3  |      | 0.405   | 0.076   | 5.325   | 0.000   |
| FPRB6  |      | 0.315   | 0.044   | 7.125   | 0.000   |
| PREP1  |      | -0.477  | 0.104   | -4.575  | 0.000   |
| PREP2  |      | -0.431  | 0.102   | -4.211  | 0.000   |
| PREP4  |      | -0.216  | 0.075   | -2.868  | 0.004   |
| FPRB5  | WITH |         |         |         |         |
| FPRB4  |      | 0.201   | 0.041   | 4.948   | 0.000   |
| HELP3  |      | 0.052   | 0.076   | 0.683   | 0.494   |
| FPRB3  |      | 0.176   | 0.041   | 4.272   | 0.000   |
| PREP3  |      | 0.171   | 0.054   | 3.147   | 0.002   |
| PREP4  |      | 0.103   | 0.057   | 1.805   | 0.071   |
| HELP4  |      | 0.223   | 0.096   | 2.322   | 0.020   |
| PREP1  |      | -0.062  | 0.030   | -2.089  | 0.037   |
| PREP2  | WITH |         |         |         |         |
| PREP1  |      | 0.753   | 0.076   | 9.932   | 0.000   |
| PHPRB1 | WITH |         |         |         |         |
| PREP1  |      | -0.004  | 0.050   | -0.082  | 0.935   |
| FPRB7  |      | -0.011  | 0.051   | -0.215  | 0.830   |
| PREP2  |      | -0.007  | 0.055   | -0.130  | 0.897   |
| HELP3  |      | -0.040  | 0.029   | -1.400  | 0.161   |
| FPRB5  |      | 0.041   | 0.023   | 1.809   | 0.070   |
| HELP4  | WITH |         |         |         |         |
| HELP2  |      | -0.296  | 0.156   | -1.897  | 0.058   |
| HELP3  | WITH |         |         |         |         |
| HELP1  |      | 0.169   | 0.067   | 2.524   | 0.012   |
| FPRB6  | WITH |         |         |         |         |
| PREP2  |      | 0.203   | 0.070   | 2.914   | 0.004   |
| PREP1  |      | 0.132   | 0.065   | 2.030   | 0.042   |
| HELP3  |      | 0.023   | 0.081   | 0.287   | 0.774   |
| HELP4  |      | 0.099   | 0.100   | 0.984   | 0.325   |
| PREP3  |      | 0.077   | 0.036   | 2.118   | 0.034   |
| FPRB5  |      | 0.318   | 0.046   | 6.914   | 0.000   |

---

|                    |        |         |         |         |
|--------------------|--------|---------|---------|---------|
| Intercepts         |        |         |         |         |
| PREP1              | 1.258  | 0.056   | 22.495  | 0.000   |
| PREP2              | 1.286  | 0.057   | 22.762  | 0.000   |
| PREP3              | 1.307  | 0.057   | 23.033  | 0.000   |
| PREP4              | 1.254  | 0.055   | 22.600  | 0.000   |
| HELP1              | 1.437  | 0.060   | 23.939  | 0.000   |
| HELP2              | 1.462  | 0.061   | 24.118  | 0.000   |
| HELP3              | 1.552  | 0.063   | 24.714  | 0.000   |
| HELP4              | 1.584  | 0.063   | 25.054  | 0.000   |
| FPRB1              | 1.080  | 0.052   | 20.581  | 0.000   |
| FPRB2              | 1.087  | 0.052   | 20.723  | 0.000   |
| FPRB3              | 0.836  | 0.049   | 17.056  | 0.000   |
| FPRB4              | 0.800  | 0.048   | 16.501  | 0.000   |
| FPRB5              | 1.051  | 0.052   | 20.303  | 0.000   |
| FPRB6              | 1.214  | 0.054   | 22.414  | 0.000   |
| FPRB7              | 0.909  | 0.049   | 18.414  | 0.000   |
| FPRB8              | 1.282  | 0.056   | 22.960  | 0.000   |
| FPRB9              | 1.213  | 0.053   | 22.685  | 0.000   |
| FPRB10             | 1.134  | 0.052   | 21.626  | 0.000   |
| PHPRB1             | 0.393  | 0.044   | 8.970   | 0.000   |
| PHPRB2             | 0.366  | 0.044   | 8.396   | 0.000   |
| PHPRB3             | 0.466  | 0.044   | 10.485  | 0.000   |
| PHPRB4             | 0.565  | 0.045   | 12.460  | 0.000   |
| PHPRB5             | 0.755  | 0.047   | 15.920  | 0.000   |
| PHPRB6             | 1.266  | 0.053   | 23.819  | 0.000   |
| PHPRB7             | 1.263  | 0.053   | 23.707  | 0.000   |
| PHPRB8             | 1.889  | 0.071   | 26.496  | 0.000   |
| PHPRB9             | 1.971  | 0.072   | 27.528  | 0.000   |
| PHPRB10            | 2.011  | 0.073   | 27.681  | 0.000   |
| Variances          |        |         |         |         |
| PREP               | 1.000  | 0.000   | 999.000 | 999.000 |
| FPRB               | 1.000  | 0.000   | 999.000 | 999.000 |
| Residual Variances |        |         |         |         |
| PREP1              | 0.095  | 0.029   | 3.273   | 0.001   |
| PREP2              | 0.092  | 0.029   | 3.186   | 0.001   |
| PREP3              | 0.114  | 0.029   | 3.959   | 0.000   |
| PREP4              | 0.113  | 0.029   | 3.867   | 0.000   |
| HELP1              | 0.192  | 0.017   | 11.163  | 0.000   |
| HELP2              | 0.142  | 0.015   | 9.189   | 0.000   |
| HELP3              | 0.060  | 0.012   | 5.257   | 0.000   |
| HELP4              | 0.044  | 0.012   | 3.696   | 0.000   |
| FPRB1              | 0.297  | 0.046   | 6.409   | 0.000   |
| FPRB2              | 0.274  | 0.046   | 5.913   | 0.000   |
| FPRB3              | 0.601  | 0.038   | 15.847  | 0.000   |
| FPRB4              | 0.609  | 0.038   | 16.093  | 0.000   |
| FPRB5              | 0.584  | 0.040   | 14.424  | 0.000   |
| FPRB6              | 0.521  | 0.042   | 12.497  | 0.000   |
| FPRB7              | 0.505  | 0.054   | 9.329   | 0.000   |
| FPRB8              | 0.767  | 0.034   | 22.348  | 0.000   |
| FPRB9              | 0.717  | 0.035   | 20.691  | 0.000   |
| FPRB10             | 0.773  | 0.051   | 15.188  | 0.000   |
| PHPRB1             | 0.442  | 0.048   | 9.195   | 0.000   |
| PHPRB2             | 0.401  | 0.058   | 6.902   | 0.000   |
| PHPRB3             | -0.048 | 999.000 | 999.000 | 999.000 |
| PHPRB4             | -1.969 | 999.000 | 999.000 | 999.000 |
| PHPRB5             | 0.826  | 0.029   | 28.340  | 0.000   |
| PHPRB6             | 0.906  | 0.021   | 42.398  | 0.000   |
| PHPRB7             | 0.971  | 0.012   | 82.171  | 0.000   |
| PHPRB8             | 0.988  | 0.006   | 164.732 | 0.000   |
| PHPRB9             | 0.988  | 0.006   | 162.164 | 0.000   |
| PHPRB10            | 0.990  | 0.005   | 183.754 | 0.000   |
| HELP               | 0.795  | 0.031   | 25.299  | 0.000   |

---

|                      | Estimate | S.E.  | Est./S.E. | Two-Tailed<br>P-Value |
|----------------------|----------|-------|-----------|-----------------------|
| PHPRB                | 0.923    | 0.024 | 38.123    | 0.000                 |
| STDY Standardization |          |       |           |                       |
| PREP BY              |          |       |           |                       |
| PREP1                | 0.951    | 0.015 | 62.196    | 0.000                 |
| PREP2                | 0.953    | 0.015 | 62.548    | 0.000                 |
| PREP3                | 0.941    | 0.015 | 61.297    | 0.000                 |
| PREP4                | 0.942    | 0.015 | 60.939    | 0.000                 |
| HELP BY              |          |       |           |                       |
| HELP1                | 0.899    | 0.010 | 93.792    | 0.000                 |
| HELP2                | 0.926    | 0.008 | 110.755   | 0.000                 |
| HELP3                | 0.969    | 0.006 | 163.350   | 0.000                 |
| HELP4                | 0.978    | 0.006 | 159.332   | 0.000                 |
| FPRB BY              |          |       |           |                       |
| FPRB1                | 0.838    | 0.028 | 30.338    | 0.000                 |
| FPRB2                | 0.852    | 0.027 | 31.334    | 0.000                 |
| FPRB3                | 0.632    | 0.030 | 21.065    | 0.000                 |
| FPRB4                | 0.626    | 0.030 | 20.695    | 0.000                 |
| FPRB5                | 0.645    | 0.031 | 20.577    | 0.000                 |
| FPRB6                | 0.692    | 0.030 | 22.954    | 0.000                 |
| FPRB7                | 0.704    | 0.038 | 18.324    | 0.000                 |
| FPRB8                | 0.483    | 0.036 | 13.593    | 0.000                 |
| FPRB9                | 0.532    | 0.033 | 16.316    | 0.000                 |
| FPRB10               | 0.476    | 0.053 | 8.905     | 0.000                 |
| PHPRB BY             |          |       |           |                       |
| PHPRB1               | 0.747    | 0.032 | 23.174    | 0.000                 |
| PHPRB2               | 0.774    | 0.038 | 20.583    | 0.000                 |
| PHPRB3               | 1.024    | 0.036 | 28.635    | 0.000                 |
| PHPRB4               | 1.723    | 0.208 | 8.291     | 0.000                 |
| PHPRB5               | 0.417    | 0.035 | 11.940    | 0.000                 |
| PHPRB6               | 0.307    | 0.035 | 8.831     | 0.000                 |
| PHPRB7               | 0.171    | 0.035 | 4.943     | 0.000                 |
| PHPRB8               | -0.108   | 0.028 | -3.895    | 0.000                 |
| PHPRB9               | -0.110   | 0.028 | -4.004    | 0.000                 |
| PHPRB10              | -0.101   | 0.027 | -3.813    | 0.000                 |
| HELP ON<br>PREP      | 0.452    | 0.035 | 13.011    | 0.000                 |
| PHPRB ON<br>PREP     | -0.008   | 0.028 | -0.303    | 0.762                 |
| FPRB                 | 0.287    | 0.048 | 5.987     | 0.000                 |
| HELP                 | -0.029   | 0.032 | -0.886    | 0.376                 |
| FPRB WITH<br>HELP    | 0.444    | 0.037 | 12.140    | 0.000                 |
| PREP                 | -0.016   | 0.045 | -0.351    | 0.726                 |
| FPRB2 WITH<br>FPRB1  | 0.908    | 0.015 | 59.870    | 0.000                 |
| HELP1                | -0.019   | 0.008 | -2.509    | 0.012                 |
| FPRB4 WITH<br>FPRB3  | 0.921    | 0.007 | 133.199   | 0.000                 |
| PREP3                | 0.019    | 0.012 | 1.531     | 0.126                 |

---

|         |      |         |         |         |         |
|---------|------|---------|---------|---------|---------|
| PHPRB10 | WITH |         |         |         |         |
| PHPRB9  |      | 0.903   | 0.008   | 116.597 | 0.000   |
| PHPRB8  |      | 0.873   | 0.010   | 90.250  | 0.000   |
| FPRB8   |      | 0.101   | 0.031   | 3.278   | 0.001   |
| PHPRB7  |      | 0.418   | 0.033   | 12.608  | 0.000   |
| PHPRB6  |      | 0.317   | 0.031   | 10.109  | 0.000   |
| FPRB5   |      | 0.118   | 0.042   | 2.819   | 0.005   |
| PHPRB3  |      | 999.000 | 999.000 | 999.000 | 999.000 |
| HELP4   |      | -0.038  | 0.025   | -1.518  | 0.129   |
| FPRB6   |      | 0.255   | 0.041   | 6.216   | 0.000   |
| FPRB9   |      | 0.045   | 0.016   | 2.754   | 0.006   |
| PHPRB2  |      | -0.015  | 0.010   | -1.491  | 0.136   |
| PREP3   |      | 0.108   | 0.030   | 3.567   | 0.000   |
| FPRB2   |      | 0.078   | 0.025   | 3.110   | 0.002   |
| FPRB1   |      | 0.068   | 0.024   | 2.801   | 0.005   |
|         |      |         |         |         |         |
| PHPRB7  | WITH |         |         |         |         |
| PHPRB6  |      | 0.823   | 0.013   | 61.363  | 0.000   |
| PHPRB5  |      | 0.435   | 0.031   | 13.905  | 0.000   |
| FPRB9   |      | 0.451   | 0.033   | 13.547  | 0.000   |
| PHPRB4  |      | 999.000 | 999.000 | 999.000 | 999.000 |
| FPRB10  |      | 0.303   | 0.036   | 8.410   | 0.000   |
| FPRB5   |      | 0.232   | 0.039   | 5.945   | 0.000   |
| FPRB8   |      | 0.372   | 0.035   | 10.563  | 0.000   |
| PHPRB1  |      | -0.041  | 0.014   | -2.986  | 0.003   |
| PREP4   |      | 0.332   | 0.062   | 5.371   | 0.000   |
| PREP3   |      | 0.338   | 0.060   | 5.610   | 0.000   |
| FPRB7   |      | 0.199   | 0.043   | 4.656   | 0.000   |
| HELP4   |      | 0.462   | 0.098   | 4.696   | 0.000   |
| HELP3   |      | 0.310   | 0.073   | 4.271   | 0.000   |
| FPRB6   |      | 0.115   | 0.045   | 2.571   | 0.010   |
|         |      |         |         |         |         |
| PREP4   | WITH |         |         |         |         |
| PREP3   |      | 0.644   | 0.089   | 7.219   | 0.000   |
|         |      |         |         |         |         |
| HELP2   | WITH |         |         |         |         |
| HELP1   |      | 0.910   | 0.011   | 79.273  | 0.000   |
| PREP1   |      | 0.601   | 0.098   | 6.166   | 0.000   |
| PREP2   |      | 0.518   | 0.090   | 5.790   | 0.000   |
|         |      |         |         |         |         |
| PHPRB2  | WITH |         |         |         |         |
| PHPRB1  |      | 0.809   | 0.023   | 35.718  | 0.000   |
| FPRB2   |      | -0.130  | 0.047   | -2.778  | 0.005   |
| FPRB9   |      | -0.043  | 0.011   | -3.727  | 0.000   |
| FPRB7   |      | -0.125  | 0.058   | -2.158  | 0.031   |
| PREP4   |      | 0.110   | 0.054   | 2.044   | 0.041   |
| HELP2   |      | -0.018  | 0.012   | -1.550  | 0.121   |
| PREP2   |      | 0.032   | 0.037   | 0.852   | 0.394   |
| FPRB6   |      | -0.076  | 0.030   | -2.505  | 0.012   |
| PREP3   |      | 0.081   | 0.052   | 1.559   | 0.119   |
| FPRB1   |      | -0.084  | 0.043   | -1.938  | 0.053   |
|         |      |         |         |         |         |
| FPRB9   | WITH |         |         |         |         |
| FPRB8   |      | 0.778   | 0.018   | 43.837  | 0.000   |
| FPRB5   |      | 0.399   | 0.038   | 10.539  | 0.000   |
| PREP2   |      | -0.304  | 0.063   | -4.795  | 0.000   |
| PREP1   |      | -0.346  | 0.067   | -5.183  | 0.000   |
| FPRB7   |      | 0.536   | 0.035   | 15.275  | 0.000   |
| HELP4   |      | 0.621   | 0.113   | 5.480   | 0.000   |
| HELP3   |      | 0.456   | 0.080   | 5.701   | 0.000   |
| FPRB6   |      | 0.312   | 0.047   | 6.622   | 0.000   |
|         |      |         |         |         |         |
| FPRB10  | WITH |         |         |         |         |
| FPRB9   |      | 0.810   | 0.017   | 48.794  | 0.000   |

---



---

|             |         |         |         |         |
|-------------|---------|---------|---------|---------|
| FPRB8       | 0.638   | 0.026   | 24.713  | 0.000   |
| HELP3       | 0.302   | 0.074   | 4.074   | 0.000   |
| FPRB3       | 0.167   | 0.040   | 4.214   | 0.000   |
| FPRB5       | 0.423   | 0.047   | 9.040   | 0.000   |
| FPRB4       | 0.147   | 0.040   | 3.719   | 0.000   |
| FPRB2       | 0.170   | 0.081   | 2.090   | 0.037   |
| FPRB7       | 0.593   | 0.044   | 13.349  | 0.000   |
| FPRB6       | 0.393   | 0.056   | 7.058   | 0.000   |
| FPRB1       | 0.183   | 0.077   | 2.374   | 0.018   |
| HELP4       | 0.495   | 0.101   | 4.905   | 0.000   |
| PREP1       | -0.252  | 0.060   | -4.179  | 0.000   |
| PREP2       | -0.198  | 0.057   | -3.500  | 0.000   |
| PHPRB5 WITH |         |         |         |         |
| PHPRB4      | 999.000 | 999.000 | 999.000 | 999.000 |
| FPRB3       | 0.320   | 0.039   | 8.245   | 0.000   |
| FPRB9       | 0.524   | 0.037   | 14.057  | 0.000   |
| FPRB4       | 0.286   | 0.039   | 7.366   | 0.000   |
| FPRB10      | 0.546   | 0.036   | 15.221  | 0.000   |
| FPRB8       | 0.415   | 0.038   | 10.835  | 0.000   |
| FPRB5       | 0.396   | 0.045   | 8.729   | 0.000   |
| FPRB6       | 0.326   | 0.053   | 6.162   | 0.000   |
| FPRB7       | 0.445   | 0.052   | 8.591   | 0.000   |
| PREP2       | -0.340  | 0.071   | -4.820  | 0.000   |
| PREP1       | -0.331  | 0.069   | -4.794  | 0.000   |
| FPRB1       | 0.389   | 0.071   | 5.476   | 0.000   |
| FPRB2       | 0.381   | 0.074   | 5.147   | 0.000   |
| HELP4       | 0.518   | 0.106   | 4.875   | 0.000   |
| HELP3       | 0.322   | 0.078   | 4.126   | 0.000   |
| PHPRB6 WITH |         |         |         |         |
| PHPRB5      | 0.579   | 0.026   | 22.557  | 0.000   |
| FPRB9       | 0.580   | 0.031   | 18.883  | 0.000   |
| PHPRB4      | 999.000 | 999.000 | 999.000 | 999.000 |
| FPRB2       | 0.199   | 0.041   | 4.892   | 0.000   |
| FPRB10      | 0.437   | 0.034   | 12.774  | 0.000   |
| FPRB8       | 0.403   | 0.035   | 11.409  | 0.000   |
| PREP4       | 0.417   | 0.068   | 6.163   | 0.000   |
| PREP3       | 0.399   | 0.064   | 6.238   | 0.000   |
| FPRB5       | 0.258   | 0.039   | 6.563   | 0.000   |
| FPRB1       | 0.169   | 0.039   | 4.367   | 0.000   |
| FPRB6       | 0.215   | 0.046   | 4.692   | 0.000   |
| FPRB7       | 0.315   | 0.044   | 7.104   | 0.000   |
| HELP4       | 0.588   | 0.110   | 5.349   | 0.000   |
| HELP3       | 0.371   | 0.079   | 4.696   | 0.000   |
| PHPRB3      | 999.000 | 999.000 | 999.000 | 999.000 |
| FPRB7 WITH  |         |         |         |         |
| FPRB5       | 0.206   | 0.052   | 3.952   | 0.000   |
| FPRB2       | -0.005  | 0.084   | -0.059  | 0.953   |
| FPRB1       | 0.015   | 0.078   | 0.197   | 0.844   |
| PREP2       | -0.263  | 0.119   | -2.219  | 0.026   |
| PREP1       | -0.322  | 0.119   | -2.707  | 0.007   |
| HELP3       | 0.144   | 0.082   | 1.764   | 0.078   |
| PREP4       | -0.347  | 0.100   | -3.467  | 0.001   |
| PREP3       | -0.318  | 0.098   | -3.230  | 0.001   |
| FPRB6       | 0.448   | 0.048   | 9.285   | 0.000   |
| HELP4       | 0.293   | 0.103   | 2.857   | 0.004   |
| PREP3 WITH  |         |         |         |         |
| PREP2       | 0.159   | 0.023   | 6.833   | 0.000   |
| PHPRB8 WITH |         |         |         |         |
| PHPRB7      | 0.407   | 0.033   | 12.222  | 0.000   |

---

---

|             |         |         |         |         |
|-------------|---------|---------|---------|---------|
| PHPRB6      | 0.264   | 0.033   | 8.061   | 0.000   |
| FPRB6       | 0.186   | 0.042   | 4.400   | 0.000   |
| PHPRB5      | -0.029  | 0.016   | -1.890  | 0.059   |
| FPRB8       | 0.138   | 0.029   | 4.760   | 0.000   |
| FPRB10      | -0.069  | 0.014   | -4.751  | 0.000   |
| PREP4       | -0.158  | 0.034   | -4.597  | 0.000   |
| HELP2       | -0.017  | 0.008   | -2.093  | 0.036   |
| PREP1       | -0.136  | 0.039   | -3.496  | 0.000   |
| FPRB7       | -0.038  | 0.018   | -2.093  | 0.036   |
| PREP2       | -0.124  | 0.038   | -3.225  | 0.001   |
| FPRB5       | 0.122   | 0.042   | 2.936   | 0.003   |
| PHPRB9 WITH |         |         |         |         |
| FPRB8       | 0.164   | 0.031   | 5.326   | 0.000   |
| PHPRB8      | 0.900   | 0.008   | 116.384 | 0.000   |
| PREP3       | 0.140   | 0.032   | 4.303   | 0.000   |
| PHPRB7      | 0.433   | 0.033   | 13.243  | 0.000   |
| PHPRB6      | 0.316   | 0.031   | 10.026  | 0.000   |
| FPRB6       | 0.241   | 0.041   | 5.943   | 0.000   |
| FPRB9       | 0.054   | 0.016   | 3.451   | 0.001   |
| FPRB5       | 0.141   | 0.041   | 3.413   | 0.001   |
| HELP1 WITH  |         |         |         |         |
| PREP1       | 0.541   | 0.089   | 6.074   | 0.000   |
| PREP2       | 0.428   | 0.078   | 5.471   | 0.000   |
| PHPRB3 WITH |         |         |         |         |
| PHPRB2      | 999.000 | 999.000 | 999.000 | 999.000 |
| FPRB6       | 999.000 | 999.000 | 999.000 | 999.000 |
| FPRB7       | 999.000 | 999.000 | 999.000 | 999.000 |
| FPRB5       | 999.000 | 999.000 | 999.000 | 999.000 |
| PREP2       | 999.000 | 999.000 | 999.000 | 999.000 |
| PREP1       | 999.000 | 999.000 | 999.000 | 999.000 |
| FPRB2       | 999.000 | 999.000 | 999.000 | 999.000 |
| FPRB1       | 999.000 | 999.000 | 999.000 | 999.000 |
| PHPRB4 WITH |         |         |         |         |
| PREP3       | 999.000 | 999.000 | 999.000 | 999.000 |
| PREP4       | 999.000 | 999.000 | 999.000 | 999.000 |
| HELP3       | 999.000 | 999.000 | 999.000 | 999.000 |
| FPRB8       | 999.000 | 999.000 | 999.000 | 999.000 |
| FPRB10      | 999.000 | 999.000 | 999.000 | 999.000 |
| FPRB9       | 999.000 | 999.000 | 999.000 | 999.000 |
| PHPRB3      | 999.000 | 999.000 | 999.000 | 999.000 |
| HELP2       | 999.000 | 999.000 | 999.000 | 999.000 |
| PHPRB2      | 999.000 | 999.000 | 999.000 | 999.000 |
| PHPRB1      | 999.000 | 999.000 | 999.000 | 999.000 |
| FPRB7       | 999.000 | 999.000 | 999.000 | 999.000 |
| FPRB6       | 999.000 | 999.000 | 999.000 | 999.000 |
| HELP4       | 999.000 | 999.000 | 999.000 | 999.000 |
| FPRB2       | 999.000 | 999.000 | 999.000 | 999.000 |
| FPRB1       | 999.000 | 999.000 | 999.000 | 999.000 |
| FPRB8 WITH  |         |         |         |         |
| FPRB5       | 0.453   | 0.035   | 13.118  | 0.000   |
| FPRB4       | -0.015  | 0.010   | -1.559  | 0.119   |
| PREP3       | -0.153  | 0.071   | -2.150  | 0.032   |
| FPRB7       | 0.490   | 0.037   | 13.368  | 0.000   |
| HELP4       | 0.511   | 0.106   | 4.818   | 0.000   |
| HELP3       | 0.405   | 0.076   | 5.325   | 0.000   |
| FPRB6       | 0.315   | 0.044   | 7.125   | 0.000   |
| PREP1       | -0.477  | 0.104   | -4.575  | 0.000   |
| PREP2       | -0.431  | 0.102   | -4.211  | 0.000   |
| PREP4       | -0.216  | 0.075   | -2.868  | 0.004   |

---

---

|            |      |        |       |        |       |
|------------|------|--------|-------|--------|-------|
| FPRB5      | WITH |        |       |        |       |
| FPRB4      |      | 0.201  | 0.041 | 4.948  | 0.000 |
| HELP3      |      | 0.052  | 0.076 | 0.683  | 0.494 |
| FPRB3      |      | 0.176  | 0.041 | 4.272  | 0.000 |
| PREP3      |      | 0.171  | 0.054 | 3.147  | 0.002 |
| PREP4      |      | 0.103  | 0.057 | 1.805  | 0.071 |
| HELP4      |      | 0.223  | 0.096 | 2.322  | 0.020 |
| PREP1      |      | -0.062 | 0.030 | -2.089 | 0.037 |
| PREP2      | WITH |        |       |        |       |
| PREP1      |      | 0.753  | 0.076 | 9.932  | 0.000 |
| PHPRB1     | WITH |        |       |        |       |
| PREP1      |      | -0.004 | 0.050 | -0.082 | 0.935 |
| FPRB7      |      | -0.011 | 0.051 | -0.215 | 0.830 |
| PREP2      |      | -0.007 | 0.055 | -0.130 | 0.897 |
| HELP3      |      | -0.040 | 0.029 | -1.400 | 0.161 |
| FPRB5      |      | 0.041  | 0.023 | 1.809  | 0.070 |
| HELP4      | WITH |        |       |        |       |
| HELP2      |      | -0.296 | 0.156 | -1.897 | 0.058 |
| HELP3      | WITH |        |       |        |       |
| HELP1      |      | 0.169  | 0.067 | 2.524  | 0.012 |
| FPRB6      | WITH |        |       |        |       |
| PREP2      |      | 0.203  | 0.070 | 2.914  | 0.004 |
| PREP1      |      | 0.132  | 0.065 | 2.030  | 0.042 |
| HELP3      |      | 0.023  | 0.081 | 0.287  | 0.774 |
| HELP4      |      | 0.099  | 0.100 | 0.984  | 0.325 |
| PREP3      |      | 0.077  | 0.036 | 2.118  | 0.034 |
| FPRB5      |      | 0.318  | 0.046 | 6.914  | 0.000 |
| Intercepts |      |        |       |        |       |
| PREP1      |      | 1.258  | 0.056 | 22.495 | 0.000 |
| PREP2      |      | 1.286  | 0.057 | 22.762 | 0.000 |
| PREP3      |      | 1.307  | 0.057 | 23.033 | 0.000 |
| PREP4      |      | 1.254  | 0.055 | 22.600 | 0.000 |
| HELP1      |      | 1.437  | 0.060 | 23.939 | 0.000 |
| HELP2      |      | 1.462  | 0.061 | 24.118 | 0.000 |
| HELP3      |      | 1.552  | 0.063 | 24.714 | 0.000 |
| HELP4      |      | 1.584  | 0.063 | 25.054 | 0.000 |
| FPRB1      |      | 1.080  | 0.052 | 20.581 | 0.000 |
| FPRB2      |      | 1.087  | 0.052 | 20.723 | 0.000 |
| FPRB3      |      | 0.836  | 0.049 | 17.056 | 0.000 |
| FPRB4      |      | 0.800  | 0.048 | 16.501 | 0.000 |
| FPRB5      |      | 1.051  | 0.052 | 20.303 | 0.000 |
| FPRB6      |      | 1.214  | 0.054 | 22.414 | 0.000 |
| FPRB7      |      | 0.909  | 0.049 | 18.414 | 0.000 |
| FPRB8      |      | 1.282  | 0.056 | 22.960 | 0.000 |
| FPRB9      |      | 1.213  | 0.053 | 22.685 | 0.000 |
| FPRB10     |      | 1.134  | 0.052 | 21.626 | 0.000 |
| PHPRB1     |      | 0.393  | 0.044 | 8.970  | 0.000 |
| PHPRB2     |      | 0.366  | 0.044 | 8.396  | 0.000 |
| PHPRB3     |      | 0.466  | 0.044 | 10.485 | 0.000 |
| PHPRB4     |      | 0.565  | 0.045 | 12.460 | 0.000 |
| PHPRB5     |      | 0.755  | 0.047 | 15.920 | 0.000 |
| PHPRB6     |      | 1.266  | 0.053 | 23.819 | 0.000 |
| PHPRB7     |      | 1.263  | 0.053 | 23.707 | 0.000 |
| PHPRB8     |      | 1.889  | 0.071 | 26.496 | 0.000 |
| PHPRB9     |      | 1.971  | 0.072 | 27.528 | 0.000 |
| PHPRB10    |      | 2.011  | 0.073 | 27.681 | 0.000 |

---

---

| Variances |       |       |         |         |
|-----------|-------|-------|---------|---------|
| PREP      | 1.000 | 0.000 | 999.000 | 999.000 |
| FPRB      | 1.000 | 0.000 | 999.000 | 999.000 |

| Residual Variances |         |         |         |         |
|--------------------|---------|---------|---------|---------|
| PREP1              | 0.095   | 0.029   | 3.273   | 0.001   |
| PREP2              | 0.092   | 0.029   | 3.186   | 0.001   |
| PREP3              | 0.114   | 0.029   | 3.959   | 0.000   |
| PREP4              | 0.113   | 0.029   | 3.867   | 0.000   |
| HELP1              | 0.192   | 0.017   | 11.163  | 0.000   |
| HELP2              | 0.142   | 0.015   | 9.189   | 0.000   |
| HELP3              | 0.060   | 0.012   | 5.257   | 0.000   |
| HELP4              | 0.044   | 0.012   | 3.696   | 0.000   |
| FPRB1              | 0.297   | 0.046   | 6.409   | 0.000   |
| FPRB2              | 0.274   | 0.046   | 5.913   | 0.000   |
| FPRB3              | 0.601   | 0.038   | 15.847  | 0.000   |
| FPRB4              | 0.609   | 0.038   | 16.093  | 0.000   |
| FPRB5              | 0.584   | 0.040   | 14.424  | 0.000   |
| FPRB6              | 0.521   | 0.042   | 12.497  | 0.000   |
| FPRB7              | 0.505   | 0.054   | 9.329   | 0.000   |
| FPRB8              | 0.767   | 0.034   | 22.348  | 0.000   |
| FPRB9              | 0.717   | 0.035   | 20.691  | 0.000   |
| FPRB10             | 0.773   | 0.051   | 15.188  | 0.000   |
| PHPRB1             | 0.442   | 0.048   | 9.195   | 0.000   |
| PHPRB2             | 0.401   | 0.058   | 6.902   | 0.000   |
| PHPRB3             | 999.000 | 999.000 | 999.000 | 999.000 |
| PHPRB4             | 999.000 | 999.000 | 999.000 | 999.000 |
| PHPRB5             | 0.826   | 0.029   | 28.340  | 0.000   |
| PHPRB6             | 0.906   | 0.021   | 42.398  | 0.000   |
| PHPRB7             | 0.971   | 0.012   | 82.171  | 0.000   |
| PHPRB8             | 0.988   | 0.006   | 164.732 | 0.000   |
| PHPRB9             | 0.988   | 0.006   | 162.164 | 0.000   |
| PHPRB10            | 0.990   | 0.005   | 183.754 | 0.000   |
| HELP               | 0.795   | 0.031   | 25.299  | 0.000   |
| PHPRB              | 0.923   | 0.024   | 38.123  | 0.000   |

## STD Standardization

|         | Estimate | S.E.  | Est./S.E. | Two-Tailed<br>P-Value |
|---------|----------|-------|-----------|-----------------------|
| PREP BY |          |       |           |                       |
| PREP1   | 2.058    | 0.073 | 28.266    | 0.000                 |
| PREP2   | 2.052    | 0.073 | 28.301    | 0.000                 |
| PREP3   | 2.206    | 0.080 | 27.726    | 0.000                 |
| PREP4   | 2.264    | 0.081 | 28.001    | 0.000                 |
| HELP BY |          |       |           |                       |
| HELP1   | 2.330    | 0.085 | 27.333    | 0.000                 |
| HELP2   | 2.376    | 0.083 | 28.748    | 0.000                 |
| HELP3   | 2.525    | 0.082 | 30.952    | 0.000                 |
| HELP4   | 2.540    | 0.081 | 31.516    | 0.000                 |
| FPRB BY |          |       |           |                       |
| FPRB1   | 1.675    | 0.082 | 20.370    | 0.000                 |
| FPRB2   | 1.709    | 0.082 | 20.927    | 0.000                 |
| FPRB3   | 1.132    | 0.073 | 15.494    | 0.000                 |
| FPRB4   | 1.147    | 0.075 | 15.300    | 0.000                 |
| FPRB5   | 1.644    | 0.106 | 15.551    | 0.000                 |
| FPRB6   | 2.039    | 0.119 | 17.062    | 0.000                 |
| FPRB7   | 2.302    | 0.152 | 15.124    | 0.000                 |
| FPRB8   | 1.272    | 0.107 | 11.927    | 0.000                 |
| FPRB9   | 1.385    | 0.098 | 14.132    | 0.000                 |

|              |         |         |         |         |
|--------------|---------|---------|---------|---------|
| FPRB10       | 1.205   | 0.144   | 8.384   | 0.000   |
| PHPRB BY     |         |         |         |         |
| PHPRB1       | 0.847   | 0.050   | 16.831  | 0.000   |
| PHPRB2       | 0.939   | 0.059   | 15.980  | 0.000   |
| PHPRB3       | 1.232   | 0.056   | 22.194  | 0.000   |
| PHPRB4       | 2.598   | 0.304   | 8.547   | 0.000   |
| PHPRB5       | 0.794   | 0.075   | 10.529  | 0.000   |
| PHPRB6       | 0.715   | 0.086   | 8.324   | 0.000   |
| PHPRB7       | 0.438   | 0.091   | 4.827   | 0.000   |
| PHPRB8       | -0.330  | 0.086   | -3.825  | 0.000   |
| PHPRB9       | -0.320  | 0.081   | -3.928  | 0.000   |
| PHPRB10      | -0.298  | 0.080   | -3.744  | 0.000   |
| HELP ON      |         |         |         |         |
| PREP         | 0.452   | 0.035   | 13.011  | 0.000   |
| PHPRB ON     |         |         |         |         |
| PREP         | -0.008  | 0.028   | -0.303  | 0.762   |
| FPRB         | 0.287   | 0.048   | 5.987   | 0.000   |
| HELP         | -0.029  | 0.032   | -0.886  | 0.376   |
| FPRB WITH    |         |         |         |         |
| HELP         | 0.444   | 0.037   | 12.140  | 0.000   |
| PREP         | -0.016  | 0.045   | -0.351  | 0.726   |
| FPRB2 WITH   |         |         |         |         |
| FPRB1        | 1.038   | 0.178   | 5.828   | 0.000   |
| HELP1        | -0.023  | 0.009   | -2.565  | 0.010   |
| FPRB4 WITH   |         |         |         |         |
| FPRB3        | 1.828   | 0.132   | 13.849  | 0.000   |
| PREP3        | 0.021   | 0.013   | 1.564   | 0.118   |
| PHPRB10 WITH |         |         |         |         |
| PHPRB9       | 7.603   | 0.468   | 16.231  | 0.000   |
| PHPRB8       | 7.760   | 0.491   | 15.789  | 0.000   |
| FPRB8        | 0.681   | 0.208   | 3.284   | 0.001   |
| PHPRB7       | 3.085   | 0.307   | 10.054  | 0.000   |
| PHPRB6       | 2.054   | 0.228   | 8.999   | 0.000   |
| FPRB5        | 0.670   | 0.239   | 2.800   | 0.005   |
| PHPRB3       | 999.000 | 999.000 | 999.000 | 999.000 |
| HELP4        | -0.060  | 0.040   | -1.517  | 0.129   |
| FPRB6        | 1.585   | 0.262   | 6.052   | 0.000   |
| FPRB9        | 0.289   | 0.104   | 2.772   | 0.006   |
| PHPRB2       | -0.034  | 0.023   | -1.498  | 0.134   |
| PREP3        | 0.251   | 0.066   | 3.824   | 0.000   |
| FPRB2        | 0.241   | 0.077   | 3.140   | 0.002   |
| FPRB1        | 0.216   | 0.077   | 2.814   | 0.005   |
| PHPRB7 WITH  |         |         |         |         |
| PHPRB6       | 4.611   | 0.260   | 17.703  | 0.000   |
| PHPRB5       | 1.899   | 0.182   | 10.419  | 0.000   |
| FPRB9        | 2.515   | 0.240   | 10.468  | 0.000   |
| PHPRB4       | 999.000 | 999.000 | 999.000 | 999.000 |
| FPRB10       | 1.707   | 0.224   | 7.632   | 0.000   |
| FPRB5        | 1.139   | 0.201   | 5.661   | 0.000   |
| FPRB8        | 2.166   | 0.240   | 9.015   | 0.000   |
| PHPRB1       | -0.079  | 0.026   | -2.987  | 0.003   |
| PREP4        | 0.677   | 0.097   | 7.006   | 0.000   |
| PREP3        | 0.676   | 0.091   | 7.403   | 0.000   |
| FPRB7        | 1.171   | 0.263   | 4.453   | 0.000   |
| HELP4        | 0.639   | 0.117   | 5.436   | 0.000   |
| HELP3        | 0.502   | 0.111   | 4.533   | 0.000   |

---

|                       |         |         |         |         |
|-----------------------|---------|---------|---------|---------|
| FPRB6                 | 0.618   | 0.241   | 2.568   | 0.010   |
| PREP4 WITH<br>PREP3   | 0.412   | 0.158   | 2.610   | 0.009   |
| HELP2 WITH<br>HELP1   | 1.001   | 0.074   | 13.464  | 0.000   |
| PREP1                 | 0.389   | 0.045   | 8.600   | 0.000   |
| PREP2                 | 0.329   | 0.043   | 7.727   | 0.000   |
| PHPRB2 WITH<br>PHPRB1 | 0.469   | 0.062   | 7.514   | 0.000   |
| FPRB2                 | -0.105  | 0.034   | -3.046  | 0.002   |
| FPRB9                 | -0.073  | 0.019   | -3.797  | 0.000   |
| FPRB7                 | -0.223  | 0.098   | -2.268  | 0.023   |
| PREP4                 | 0.068   | 0.031   | 2.183   | 0.029   |
| HELP2                 | -0.014  | 0.009   | -1.573  | 0.116   |
| PREP2                 | 0.016   | 0.019   | 0.860   | 0.390   |
| FPRB6                 | -0.124  | 0.047   | -2.651  | 0.008   |
| PREP3                 | 0.050   | 0.031   | 1.622   | 0.105   |
| FPRB1                 | -0.071  | 0.034   | -2.053  | 0.040   |
| FPRB9 WITH<br>FPRB8   | 3.958   | 0.303   | 13.082  | 0.000   |
| FPRB5                 | 1.714   | 0.222   | 7.704   | 0.000   |
| PREP2                 | -0.439  | 0.080   | -5.472  | 0.000   |
| PREP1                 | -0.509  | 0.083   | -6.103  | 0.000   |
| FPRB7                 | 2.747   | 0.336   | 8.180   | 0.000   |
| HELP4                 | 0.750   | 0.117   | 6.429   | 0.000   |
| HELP3                 | 0.645   | 0.110   | 5.854   | 0.000   |
| FPRB6                 | 1.462   | 0.275   | 5.316   | 0.000   |
| FPRB10 WITH<br>FPRB9  | 3.975   | 0.310   | 12.801  | 0.000   |
| FPRB8                 | 3.275   | 0.289   | 11.346  | 0.000   |
| HELP3                 | 0.431   | 0.104   | 4.130   | 0.000   |
| FPRB3                 | 0.515   | 0.135   | 3.812   | 0.000   |
| FPRB5                 | 1.831   | 0.273   | 6.699   | 0.000   |
| FPRB4                 | 0.469   | 0.138   | 3.409   | 0.001   |
| FPRB2                 | 0.397   | 0.198   | 2.006   | 0.045   |
| FPRB7                 | 3.065   | 0.393   | 7.792   | 0.000   |
| FPRB6                 | 1.860   | 0.341   | 5.458   | 0.000   |
| FPRB1                 | 0.443   | 0.196   | 2.261   | 0.024   |
| HELP4                 | 0.603   | 0.112   | 5.385   | 0.000   |
| PREP1                 | -0.374  | 0.079   | -4.714  | 0.000   |
| PREP2                 | -0.288  | 0.076   | -3.790  | 0.000   |
| PHPRB5 WITH<br>PHPRB4 | 999.000 | 999.000 | 999.000 | 999.000 |
| FPRB3                 | 0.767   | 0.099   | 7.761   | 0.000   |
| FPRB9                 | 1.997   | 0.181   | 11.035  | 0.000   |
| FPRB4                 | 0.708   | 0.101   | 7.035   | 0.000   |
| FPRB10                | 2.102   | 0.181   | 11.613  | 0.000   |
| FPRB8                 | 1.655   | 0.179   | 9.266   | 0.000   |
| FPRB5                 | 1.331   | 0.162   | 8.236   | 0.000   |
| FPRB6                 | 1.200   | 0.200   | 6.003   | 0.000   |
| FPRB7                 | 1.785   | 0.223   | 8.016   | 0.000   |
| PREP2                 | -0.385  | 0.059   | -6.493  | 0.000   |
| PREP1                 | -0.382  | 0.061   | -6.306  | 0.000   |
| FPRB1                 | 0.732   | 0.121   | 6.070   | 0.000   |
| FPRB2                 | 0.691   | 0.120   | 5.781   | 0.000   |
| HELP4                 | 0.490   | 0.086   | 5.698   | 0.000   |
| HELP3                 | 0.357   | 0.081   | 4.393   | 0.000   |

---

|             |  |         |         |         |         |
|-------------|--|---------|---------|---------|---------|
| PHPRB6 WITH |  |         |         |         |         |
| PHPRB5      |  | 2.221   | 0.173   | 12.817  | 0.000   |
| FPRB9       |  | 2.834   | 0.225   | 12.616  | 0.000   |
| PHPRB4      |  | 999.000 | 999.000 | 999.000 | 999.000 |
| FPRB2       |  | 0.463   | 0.091   | 5.113   | 0.000   |
| FPRB10      |  | 2.157   | 0.210   | 10.286  | 0.000   |
| FPRB8       |  | 2.059   | 0.215   | 9.596   | 0.000   |
| PREP4       |  | 0.745   | 0.087   | 8.516   | 0.000   |
| PREP3       |  | 0.701   | 0.082   | 8.531   | 0.000   |
| FPRB5       |  | 1.112   | 0.175   | 6.364   | 0.000   |
| FPRB1       |  | 0.407   | 0.090   | 4.514   | 0.000   |
| FPRB6       |  | 1.014   | 0.219   | 4.621   | 0.000   |
| FPRB7       |  | 1.622   | 0.253   | 6.415   | 0.000   |
| HELP4       |  | 0.713   | 0.109   | 6.526   | 0.000   |
| HELP3       |  | 0.527   | 0.103   | 5.118   | 0.000   |
| PHPRB3      |  | 999.000 | 999.000 | 999.000 | 999.000 |
| FPRB7 WITH  |  |         |         |         |         |
| FPRB5       |  | 0.929   | 0.277   | 3.351   | 0.001   |
| FPRB2       |  | -0.012  | 0.203   | -0.059  | 0.953   |
| FPRB1       |  | 0.039   | 0.200   | 0.194   | 0.846   |
| PREP2       |  | -0.400  | 0.173   | -2.310  | 0.021   |
| PREP1       |  | -0.499  | 0.174   | -2.868  | 0.004   |
| HELP3       |  | 0.214   | 0.124   | 1.726   | 0.084   |
| PREP4       |  | -0.650  | 0.181   | -3.589  | 0.000   |
| PREP3       |  | -0.585  | 0.178   | -3.293  | 0.001   |
| FPRB6       |  | 2.211   | 0.381   | 5.810   | 0.000   |
| HELP4       |  | 0.373   | 0.132   | 2.813   | 0.005   |
| PREP3 WITH  |  |         |         |         |         |
| PREP2       |  | 0.083   | 0.013   | 6.345   | 0.000   |
| PHPRB8 WITH |  |         |         |         |         |
| PHPRB7      |  | 3.126   | 0.320   | 9.769   | 0.000   |
| PHPRB6      |  | 1.777   | 0.238   | 7.454   | 0.000   |
| FPRB6       |  | 1.205   | 0.277   | 4.348   | 0.000   |
| PHPRB5      |  | -0.154  | 0.082   | -1.877  | 0.060   |
| FPRB8       |  | 0.970   | 0.209   | 4.637   | 0.000   |
| FPRB10      |  | -0.464  | 0.102   | -4.567  | 0.000   |
| PREP4       |  | -0.387  | 0.073   | -5.267  | 0.000   |
| HELP2       |  | -0.049  | 0.023   | -2.117  | 0.034   |
| PREP1       |  | -0.275  | 0.070   | -3.923  | 0.000   |
| FPRB7       |  | -0.265  | 0.128   | -2.066  | 0.039   |
| PREP2       |  | -0.247  | 0.069   | -3.564  | 0.000   |
| FPRB5       |  | 0.724   | 0.250   | 2.894   | 0.004   |
| PHPRB9 WITH |  |         |         |         |         |
| FPRB8       |  | 1.088   | 0.208   | 5.217   | 0.000   |
| PHPRB8      |  | 7.881   | 0.491   | 16.037  | 0.000   |
| PREP3       |  | 0.319   | 0.065   | 4.887   | 0.000   |
| PHPRB7      |  | 3.149   | 0.301   | 10.446  | 0.000   |
| PHPRB6      |  | 2.016   | 0.225   | 8.976   | 0.000   |
| FPRB6       |  | 1.477   | 0.257   | 5.750   | 0.000   |
| FPRB9       |  | 0.342   | 0.099   | 3.464   | 0.001   |
| FPRB5       |  | 0.791   | 0.236   | 3.359   | 0.001   |
| HELP1 WITH  |  |         |         |         |         |
| PREP1       |  | 0.410   | 0.047   | 8.772   | 0.000   |
| PREP2       |  | 0.319   | 0.044   | 7.303   | 0.000   |
| PHPRB3 WITH |  |         |         |         |         |
| PHPRB2      |  | 999.000 | 999.000 | 999.000 | 999.000 |
| FPRB6       |  | 999.000 | 999.000 | 999.000 | 999.000 |
| FPRB7       |  | 999.000 | 999.000 | 999.000 | 999.000 |

---

|             |         |         |         |         |
|-------------|---------|---------|---------|---------|
| FPRB5       | 999.000 | 999.000 | 999.000 | 999.000 |
| PREP2       | 999.000 | 999.000 | 999.000 | 999.000 |
| PREP1       | 999.000 | 999.000 | 999.000 | 999.000 |
| FPRB2       | 999.000 | 999.000 | 999.000 | 999.000 |
| FPRB1       | 999.000 | 999.000 | 999.000 | 999.000 |
| PHPRB4 WITH |         |         |         |         |
| PREP3       | 999.000 | 999.000 | 999.000 | 999.000 |
| PREP4       | 999.000 | 999.000 | 999.000 | 999.000 |
| HELP3       | 999.000 | 999.000 | 999.000 | 999.000 |
| FPRB8       | 999.000 | 999.000 | 999.000 | 999.000 |
| FPRB10      | 999.000 | 999.000 | 999.000 | 999.000 |
| FPRB9       | 999.000 | 999.000 | 999.000 | 999.000 |
| PHPRB3      | 999.000 | 999.000 | 999.000 | 999.000 |
| HELP2       | 999.000 | 999.000 | 999.000 | 999.000 |
| PHPRB2      | 999.000 | 999.000 | 999.000 | 999.000 |
| PHPRB1      | 999.000 | 999.000 | 999.000 | 999.000 |
| FPRB7       | 999.000 | 999.000 | 999.000 | 999.000 |
| FPRB6       | 999.000 | 999.000 | 999.000 | 999.000 |
| HELP4       | 999.000 | 999.000 | 999.000 | 999.000 |
| FPRB2       | 999.000 | 999.000 | 999.000 | 999.000 |
| FPRB1       | 999.000 | 999.000 | 999.000 | 999.000 |
| FPRB8 WITH  |         |         |         |         |
| FPRB5       | 2.034   | 0.228   | 8.933   | 0.000   |
| FPRB4       | -0.049  | 0.032   | -1.561  | 0.119   |
| PREP3       | -0.280  | 0.130   | -2.164  | 0.030   |
| FPRB7       | 2.624   | 0.330   | 7.948   | 0.000   |
| HELP4       | 0.644   | 0.118   | 5.469   | 0.000   |
| HELP3       | 0.598   | 0.111   | 5.402   | 0.000   |
| FPRB6       | 1.544   | 0.269   | 5.737   | 0.000   |
| PREP1       | -0.734  | 0.138   | -5.334  | 0.000   |
| PREP2       | -0.652  | 0.136   | -4.799  | 0.000   |
| PREP4       | -0.402  | 0.137   | -2.940  | 0.003   |
| FPRB5 WITH  |         |         |         |         |
| FPRB4       | 0.559   | 0.127   | 4.406   | 0.000   |
| HELP3       | 0.065   | 0.095   | 0.684   | 0.494   |
| FPRB3       | 0.476   | 0.123   | 3.876   | 0.000   |
| PREP3       | 0.264   | 0.077   | 3.441   | 0.001   |
| PREP4       | 0.161   | 0.086   | 1.875   | 0.061   |
| HELP4       | 0.237   | 0.101   | 2.347   | 0.019   |
| PREP1       | -0.081  | 0.037   | -2.165  | 0.030   |
| PREP2 WITH  |         |         |         |         |
| PREP1       | 0.329   | 0.133   | 2.482   | 0.013   |
| PHPRB1 WITH |         |         |         |         |
| PREP1       | -0.002  | 0.025   | -0.082  | 0.934   |
| FPRB7       | -0.019  | 0.090   | -0.216  | 0.829   |
| PREP2       | -0.004  | 0.027   | -0.130  | 0.897   |
| HELP3       | -0.019  | 0.014   | -1.406  | 0.160   |
| FPRB5       | 0.060   | 0.033   | 1.816   | 0.069   |
| HELP4 WITH  |         |         |         |         |
| HELP2       | -0.157  | 0.061   | -2.582  | 0.010   |
| HELP3 WITH  |         |         |         |         |
| HELP1       | 0.123   | 0.060   | 2.051   | 0.040   |
| FPRB6 WITH  |         |         |         |         |
| PREP2       | 0.283   | 0.089   | 3.165   | 0.002   |
| PREP1       | 0.188   | 0.089   | 2.110   | 0.035   |
| HELP3       | 0.032   | 0.111   | 0.286   | 0.775   |

---



---

|                    |         |         |         |         |
|--------------------|---------|---------|---------|---------|
| HELP4              | 0.115   | 0.118   | 0.976   | 0.329   |
| PREP3              | 0.129   | 0.059   | 2.205   | 0.027   |
| FPRB5              | 1.318   | 0.246   | 5.347   | 0.000   |
| Intercepts         |         |         |         |         |
| PREP1              | 2.721   | 0.091   | 29.771  | 0.000   |
| PREP2              | 2.771   | 0.091   | 30.444  | 0.000   |
| PREP3              | 3.064   | 0.099   | 30.940  | 0.000   |
| PREP4              | 3.013   | 0.102   | 29.667  | 0.000   |
| HELP1              | 3.727   | 0.110   | 34.013  | 0.000   |
| HELP2              | 3.752   | 0.108   | 34.609  | 0.000   |
| HELP3              | 4.043   | 0.110   | 36.727  | 0.000   |
| HELP4              | 4.116   | 0.110   | 37.482  | 0.000   |
| FPRB1              | 2.159   | 0.084   | 25.567  | 0.000   |
| FPRB2              | 2.180   | 0.085   | 25.730  | 0.000   |
| FPRB3              | 1.496   | 0.076   | 19.773  | 0.000   |
| FPRB4              | 1.466   | 0.077   | 18.929  | 0.000   |
| FPRB5              | 2.677   | 0.108   | 24.863  | 0.000   |
| FPRB6              | 3.577   | 0.125   | 28.726  | 0.000   |
| FPRB7              | 2.973   | 0.138   | 21.517  | 0.000   |
| FPRB8              | 3.375   | 0.111   | 30.330  | 0.000   |
| FPRB9              | 3.159   | 0.110   | 28.708  | 0.000   |
| FPRB10             | 2.870   | 0.107   | 26.828  | 0.000   |
| PHPRB1             | 0.446   | 0.048   | 9.310   | 0.000   |
| PHPRB2             | 0.445   | 0.051   | 8.667   | 0.000   |
| PHPRB3             | 0.561   | 0.051   | 11.028  | 0.000   |
| PHPRB4             | 0.852   | 0.064   | 13.370  | 0.000   |
| PHPRB5             | 1.436   | 0.080   | 17.858  | 0.000   |
| PHPRB6             | 2.948   | 0.098   | 29.947  | 0.000   |
| PHPRB7             | 3.239   | 0.108   | 29.890  | 0.000   |
| PHPRB8             | 5.775   | 0.129   | 44.698  | 0.000   |
| PHPRB9             | 5.714   | 0.122   | 46.653  | 0.000   |
| PHPRB10            | 5.911   | 0.124   | 47.594  | 0.000   |
| Variances          |         |         |         |         |
| PREP               | 1.000   | 0.000   | 999.000 | 999.000 |
| FPRB               | 1.000   | 0.000   | 999.000 | 999.000 |
| Residual Variances |         |         |         |         |
| PREP1              | 0.446   | 0.135   | 3.311   | 0.001   |
| PREP2              | 0.429   | 0.133   | 3.222   | 0.001   |
| PREP3              | 0.628   | 0.155   | 4.044   | 0.000   |
| PREP4              | 0.650   | 0.165   | 3.943   | 0.000   |
| HELP1              | 1.293   | 0.098   | 13.172  | 0.000   |
| HELP2              | 0.937   | 0.091   | 10.264  | 0.000   |
| HELP3              | 0.410   | 0.074   | 5.512   | 0.000   |
| HELP4              | 0.299   | 0.079   | 3.799   | 0.000   |
| FPRB1              | 1.186   | 0.180   | 6.592   | 0.000   |
| FPRB2              | 1.102   | 0.182   | 6.070   | 0.000   |
| FPRB3              | 1.927   | 0.133   | 14.498  | 0.000   |
| FPRB4              | 2.045   | 0.140   | 14.630  | 0.000   |
| FPRB5              | 3.789   | 0.275   | 13.754  | 0.000   |
| FPRB6              | 4.526   | 0.371   | 12.189  | 0.000   |
| FPRB7              | 5.394   | 0.598   | 9.026   | 0.000   |
| FPRB8              | 5.317   | 0.347   | 15.323  | 0.000   |
| FPRB9              | 4.863   | 0.324   | 15.019  | 0.000   |
| FPRB10             | 4.955   | 0.394   | 12.585  | 0.000   |
| PHPRB1             | 0.570   | 0.061   | 9.337   | 0.000   |
| PHPRB2             | 0.592   | 0.085   | 6.995   | 0.000   |
| PHPRB3             | 999.000 | 999.000 | 999.000 | 999.000 |
| PHPRB4             | 999.000 | 999.000 | 999.000 | 999.000 |
| PHPRB5             | 2.990   | 0.176   | 16.957  | 0.000   |
| PHPRB6             | 4.915   | 0.258   | 19.084  | 0.000   |
| PHPRB7             | 6.385   | 0.327   | 19.508  | 0.000   |

---

---

|         |       |       |        |       |
|---------|-------|-------|--------|-------|
| PHPRB8  | 9.239 | 0.559 | 16.526 | 0.000 |
| PHPRB9  | 8.299 | 0.484 | 17.147 | 0.000 |
| PHPRB10 | 8.548 | 0.499 | 17.116 | 0.000 |
| HELP    | 0.795 | 0.031 | 25.299 | 0.000 |
| PHPRB   | 0.923 | 0.024 | 38.123 | 0.000 |

R-SQUARE

| Observed Variable | Estimate  | S.E.        | Est./S.E. | Two-Tailed P-Value |
|-------------------|-----------|-------------|-----------|--------------------|
| PREP1             | 0.905     | 0.029       | 31.098    | 0.000              |
| PREP2             | 0.908     | 0.029       | 31.274    | 0.000              |
| PREP3             | 0.886     | 0.029       | 30.649    | 0.000              |
| PREP4             | 0.887     | 0.029       | 30.469    | 0.000              |
| HELP1             | 0.808     | 0.017       | 46.896    | 0.000              |
| HELP2             | 0.858     | 0.015       | 55.377    | 0.000              |
| HELP3             | 0.940     | 0.012       | 81.675    | 0.000              |
| HELP4             | 0.956     | 0.012       | 79.666    | 0.000              |
| FPRB1             | 0.703     | 0.046       | 15.169    | 0.000              |
| FPRB2             | 0.726     | 0.046       | 15.667    | 0.000              |
| FPRB3             | 0.399     | 0.038       | 10.533    | 0.000              |
| FPRB4             | 0.391     | 0.038       | 10.348    | 0.000              |
| FPRB5             | 0.416     | 0.040       | 10.288    | 0.000              |
| FPRB6             | 0.479     | 0.042       | 11.477    | 0.000              |
| FPRB7             | 0.495     | 0.054       | 9.162     | 0.000              |
| FPRB8             | 0.233     | 0.034       | 6.797     | 0.000              |
| FPRB9             | 0.283     | 0.035       | 8.158     | 0.000              |
| FPRB10            | 0.227     | 0.051       | 4.453     | 0.000              |
| PHPRB1            | 0.558     | 0.048       | 11.587    | 0.000              |
| PHPRB2            | 0.599     | 0.058       | 10.291    | 0.000              |
| PHPRB3            | Undefined | 0.10482E+01 |           |                    |
| PHPRB4            | Undefined | 0.29691E+01 |           |                    |
| PHPRB5            | 0.174     | 0.029       | 5.970     | 0.000              |
| PHPRB6            | 0.094     | 0.021       | 4.416     | 0.000              |
| PHPRB7            | 0.029     | 0.012       | 2.472     | 0.013              |
| PHPRB8            | 0.012     | 0.006       | 1.947     | 0.051              |
| PHPRB9            | 0.012     | 0.006       | 2.002     | 0.045              |
| PHPRB10           | 0.010     | 0.005       | 1.906     | 0.057              |

| Latent Variable | Estimate | S.E.  | Est./S.E. | Two-Tailed P-Value |
|-----------------|----------|-------|-----------|--------------------|
| HELP            | 0.205    | 0.031 | 6.505     | 0.000              |
| PHPRB           | 0.077    | 0.024 | 3.196     | 0.001              |

QUALITY OF NUMERICAL RESULTS

Condition Number for the Information Matrix (ratio of smallest to largest eigenvalue) 0.131E-04

MODEL MODIFICATION INDICES

NOTE: Modification indices for direct effects of observed dependent variables regressed on covariates may not be included. To include these, request MODINDICES (ALL).

Minimum M.I. value for printing the modification index 0.000

M.I. E.P.C. Std E.P.C. StdYX E.P.C.

## BY Statements

|      |            |        |        |        |        |
|------|------------|--------|--------|--------|--------|
| PREP | BY HELP1   | 0.015  | -0.002 | -0.003 | -0.001 |
| PREP | BY HELP2   | 0.794  | -0.012 | -0.024 | -0.009 |
| PREP | BY HELP3   | 0.838  | 0.018  | 0.036  | 0.014  |
| PREP | BY HELP4   | 0.244  | 0.010  | 0.020  | 0.008  |
| PREP | BY FPRB1   | 0.039  | 0.002  | 0.004  | 0.002  |
| PREP | BY FPRB2   | 1.490  | -0.011 | -0.023 | -0.011 |
| PREP | BY FPRB3   | 2.677  | -0.018 | -0.037 | -0.021 |
| PREP | BY FPRB4   | 1.841  | 0.015  | 0.032  | 0.017  |
| PREP | BY FPRB5   | 0.995  | -0.037 | -0.076 | -0.030 |
| PREP | BY FPRB6   | 6.798  | 0.111  | 0.229  | 0.078  |
| PREP | BY FPRB7   | 8.553  | 0.263  | 0.542  | 0.166  |
| PREP | BY FPRB8   | 12.813 | -0.213 | -0.438 | -0.166 |
| PREP | BY FPRB9   | 12.250 | 0.087  | 0.178  | 0.068  |
| PREP | BY FPRB10  | 1.140  | -0.027 | -0.056 | -0.022 |
| PREP | BY PHPRB1  | 0.003  | 0.001  | 0.001  | 0.001  |
| PREP | BY PHPRB2  | 0.151  | -0.005 | -0.009 | -0.008 |
| PREP | BY PHPRB3  | 0.057  | -0.003 | -0.007 | -0.006 |
| PREP | BY PHPRB4  | 0.172  | 0.016  | 0.033  | 0.022  |
| PREP | BY PHPRB5  | 0.024  | 0.004  | 0.009  | 0.005  |
| PREP | BY PHPRB6  | 0.250  | 0.012  | 0.024  | 0.010  |
| PREP | BY PHPRB7  | 5.376  | 0.065  | 0.134  | 0.052  |
| PREP | BY PHPRB8  | 0.139  | -0.011 | -0.023 | -0.007 |
| PREP | BY PHPRB9  | 13.068 | 0.081  | 0.166  | 0.057  |
| PREP | BY PHPRB10 | 0.881  | -0.023 | -0.047 | -0.016 |
| HELP | BY PREP1   | 0.008  | -0.001 | -0.002 | -0.001 |
| HELP | BY PREP2   | 0.006  | 0.001  | 0.002  | 0.001  |
| HELP | BY PREP3   | 0.000  | 0.000  | 0.000  | 0.000  |
| HELP | BY PREP4   | 0.000  | 0.000  | 0.000  | 0.000  |
| HELP | BY FPRB1   | 0.314  | 0.005  | 0.012  | 0.006  |
| HELP | BY FPRB2   | 1.033  | -0.009 | -0.021 | -0.011 |
| HELP | BY FPRB3   | 1.000  | -0.011 | -0.025 | -0.014 |
| HELP | BY FPRB4   | 0.101  | -0.003 | -0.008 | -0.004 |
| HELP | BY FPRB5   | 0.016  | 0.005  | 0.011  | 0.004  |
| HELP | BY FPRB6   | 4.432  | 0.084  | 0.195  | 0.066  |
| HELP | BY FPRB7   | 8.544  | 0.126  | 0.292  | 0.089  |
| HELP | BY FPRB8   | 12.781 | -0.101 | -0.236 | -0.090 |
| HELP | BY FPRB9   | 7.399  | 0.062  | 0.143  | 0.055  |
| HELP | BY FPRB10  | 1.988  | -0.050 | -0.116 | -0.046 |
| HELP | BY PHPRB1  | 0.311  | 0.004  | 0.010  | 0.009  |
| HELP | BY PHPRB2  | 0.513  | -0.006 | -0.014 | -0.011 |
| HELP | BY PHPRB3  | 4.415  | -0.025 | -0.059 | -0.049 |
| HELP | BY PHPRB4  | 4.527  | 0.074  | 0.172  | 0.114  |
| HELP | BY PHPRB5  | 0.116  | 0.008  | 0.020  | 0.010  |
| HELP | BY PHPRB6  | 2.888  | 0.035  | 0.081  | 0.035  |
| HELP | BY PHPRB7  | 2.301  | 0.039  | 0.090  | 0.035  |
| HELP | BY PHPRB8  | 2.560  | -0.036 | -0.083 | -0.027 |
| HELP | BY PHPRB9  | 1.662  | 0.024  | 0.056  | 0.019  |
| HELP | BY PHPRB10 | 2.315  | 0.032  | 0.075  | 0.026  |
| FPRB | BY PREP1   | 0.017  | -0.002 | -0.003 | -0.001 |
| FPRB | BY PREP2   | 0.013  | 0.001  | 0.002  | 0.001  |
| FPRB | BY PREP3   | 0.001  | 0.000  | 0.001  | 0.000  |
| FPRB | BY PREP4   | 0.000  | 0.000  | 0.000  | 0.000  |
| FPRB | BY HELP1   | 0.174  | 0.006  | 0.010  | 0.004  |
| FPRB | BY HELP2   | 0.755  | 0.013  | 0.021  | 0.008  |
| FPRB | BY HELP3   | 2.897  | -0.042 | -0.070 | -0.027 |
| FPRB | BY HELP4   | 0.107  | -0.008 | -0.014 | -0.005 |
| FPRB | BY PHPRB1  | 0.060  | 0.003  | 0.006  | 0.005  |
| FPRB | BY PHPRB2  | 0.466  | -0.010 | -0.017 | -0.014 |
| FPRB | BY PHPRB3  | 0.939  | -0.026 | -0.044 | -0.036 |
| FPRB | BY PHPRB4  | 2.300  | 0.188  | 0.316  | 0.209  |
| FPRB | BY PHPRB5  | 0.101  | 0.027  | 0.046  | 0.024  |
| FPRB | BY PHPRB6  | 6.418  | 0.113  | 0.189  | 0.081  |

---

|       |            |       |        |        |        |
|-------|------------|-------|--------|--------|--------|
| FPRB  | BY PHPRB7  | 0.143 | 0.018  | 0.029  | 0.011  |
| FPRB  | BY PHPRB8  | 0.464 | -0.025 | -0.042 | -0.014 |
| FPRB  | BY PHPRB9  | 0.125 | 0.011  | 0.018  | 0.006  |
| FPRB  | BY PHPRB10 | 1.200 | 0.040  | 0.067  | 0.023  |
| PHPRB | BY PREP1   | 0.012 | -0.001 | -0.001 | -0.001 |
| PHPRB | BY PREP2   | 0.006 | 0.001  | 0.001  | 0.000  |
| PHPRB | BY PREP3   | 0.916 | -0.029 | -0.024 | -0.010 |
| PHPRB | BY PREP4   | 1.080 | 0.032  | 0.027  | 0.011  |
| PHPRB | BY HELP1   | 2.054 | -0.031 | -0.027 | -0.010 |
| PHPRB | BY HELP2   | 2.254 | 0.033  | 0.028  | 0.011  |
| PHPRB | BY HELP3   | 0.326 | -0.021 | -0.018 | -0.007 |
| PHPRB | BY HELP4   | 0.199 | 0.017  | 0.015  | 0.006  |
| PHPRB | BY FPRB1   | 0.210 | 0.014  | 0.012  | 0.006  |
| PHPRB | BY FPRB2   | 0.954 | -0.030 | -0.026 | -0.013 |
| PHPRB | BY FPRB3   | 0.256 | -0.008 | -0.006 | -0.004 |
| PHPRB | BY FPRB4   | 0.674 | 0.013  | 0.011  | 0.006  |
| PHPRB | BY FPRB5   | 0.033 | 0.011  | 0.010  | 0.004  |
| PHPRB | BY FPRB6   | 0.615 | 0.113  | 0.096  | 0.032  |
| PHPRB | BY FPRB7   | 2.923 | -1.584 | -1.342 | -0.410 |
| PHPRB | BY FPRB8   | 0.481 | 0.049  | 0.042  | 0.016  |
| PHPRB | BY FPRB9   | 2.026 | -0.082 | -0.069 | -0.027 |
| PHPRB | BY FPRB10  | 0.928 | 0.072  | 0.061  | 0.024  |

## WITH Statements

|       |            |       |        |        |        |
|-------|------------|-------|--------|--------|--------|
| PREP3 | WITH PREP1 | 0.000 | 0.001  | 0.001  | 0.001  |
| PREP4 | WITH PREP1 | 0.000 | 0.002  | 0.002  | 0.003  |
| PREP4 | WITH PREP2 | 0.001 | -0.002 | -0.002 | -0.004 |
| HELP1 | WITH PREP3 | 0.377 | 0.008  | 0.008  | 0.009  |
| HELP1 | WITH PREP4 | 0.386 | -0.008 | -0.008 | -0.009 |
| HELP2 | WITH PREP3 | 0.416 | -0.008 | -0.008 | -0.010 |
| HELP2 | WITH PREP4 | 0.215 | 0.006  | 0.006  | 0.007  |
| HELP3 | WITH PREP1 | 0.789 | -0.014 | -0.014 | -0.032 |
| HELP3 | WITH PREP2 | 0.636 | 0.012  | 0.012  | 0.027  |
| HELP3 | WITH PREP3 | 0.001 | -0.001 | -0.001 | -0.001 |
| HELP3 | WITH PREP4 | 0.064 | 0.005  | 0.005  | 0.010  |
| HELP3 | WITH HELP2 | 0.039 | 0.026  | 0.026  | 0.043  |
| HELP4 | WITH PREP1 | 0.737 | 0.013  | 0.013  | 0.036  |
| HELP4 | WITH PREP2 | 0.599 | -0.011 | -0.011 | -0.031 |
| HELP4 | WITH PREP3 | 0.016 | 0.002  | 0.002  | 0.006  |
| HELP4 | WITH PREP4 | 0.004 | -0.001 | -0.001 | -0.003 |
| HELP4 | WITH HELP1 | 0.256 | -0.066 | -0.066 | -0.107 |
| HELP4 | WITH HELP3 | 0.154 | 0.070  | 0.070  | 0.200  |
| FPRB1 | WITH PREP1 | 0.159 | 0.003  | 0.003  | 0.005  |
| FPRB1 | WITH PREP2 | 0.000 | 0.000  | 0.000  | 0.000  |
| FPRB1 | WITH PREP3 | 0.011 | 0.001  | 0.001  | 0.001  |
| FPRB1 | WITH PREP4 | 0.424 | -0.008 | -0.008 | -0.009 |
| FPRB1 | WITH HELP1 | 1.178 | 0.031  | 0.031  | 0.025  |
| FPRB1 | WITH HELP2 | 0.836 | 0.015  | 0.015  | 0.014  |
| FPRB1 | WITH HELP3 | 0.121 | -0.005 | -0.005 | -0.007 |
| FPRB1 | WITH HELP4 | 0.590 | -0.012 | -0.012 | -0.020 |
| FPRB2 | WITH PREP1 | 0.199 | -0.004 | -0.004 | -0.005 |
| FPRB2 | WITH PREP2 | 0.060 | 0.002  | 0.002  | 0.003  |
| FPRB2 | WITH PREP3 | 0.006 | -0.001 | -0.001 | -0.001 |
| FPRB2 | WITH PREP4 | 0.003 | 0.001  | 0.001  | 0.001  |
| FPRB2 | WITH HELP2 | 0.678 | -0.016 | -0.016 | -0.015 |
| FPRB2 | WITH HELP3 | 0.003 | -0.001 | -0.001 | -0.001 |
| FPRB2 | WITH HELP4 | 0.255 | 0.008  | 0.008  | 0.013  |
| FPRB3 | WITH PREP1 | 0.063 | 0.002  | 0.002  | 0.003  |
| FPRB3 | WITH PREP2 | 0.457 | -0.007 | -0.007 | -0.007 |
| FPRB3 | WITH PREP3 | 0.171 | 0.014  | 0.014  | 0.013  |
| FPRB3 | WITH PREP4 | 0.002 | -0.001 | -0.001 | -0.001 |
| FPRB3 | WITH HELP1 | 0.161 | -0.004 | -0.004 | -0.003 |
| FPRB3 | WITH HELP2 | 0.106 | 0.003  | 0.003  | 0.002  |

---

|        |             |       |        |        |        |
|--------|-------------|-------|--------|--------|--------|
| FPRB3  | WITH HELP3  | 0.069 | -0.004 | -0.004 | -0.005 |
| FPRB3  | WITH HELP4  | 0.074 | 0.005  | 0.005  | 0.006  |
| FPRB3  | WITH FPRB1  | 0.001 | 0.000  | 0.000  | 0.000  |
| FPRB3  | WITH FPRB2  | 0.000 | 0.000  | 0.000  | 0.000  |
| FPRB4  | WITH PREP1  | 0.030 | -0.002 | -0.002 | -0.002 |
| FPRB4  | WITH PREP2  | 0.141 | 0.004  | 0.004  | 0.004  |
| FPRB4  | WITH PREP4  | 0.196 | 0.009  | 0.009  | 0.008  |
| FPRB4  | WITH HELP1  | 0.015 | -0.001 | -0.001 | -0.001 |
| FPRB4  | WITH HELP2  | 0.124 | -0.004 | -0.004 | -0.003 |
| FPRB4  | WITH HELP3  | 0.117 | 0.006  | 0.006  | 0.006  |
| FPRB4  | WITH HELP4  | 0.000 | 0.000  | 0.000  | 0.000  |
| FPRB4  | WITH FPRB1  | 0.498 | -0.007 | -0.007 | -0.005 |
| FPRB4  | WITH FPRB2  | 0.721 | 0.009  | 0.009  | 0.006  |
| FPRB5  | WITH PREP2  | 1.568 | -0.175 | -0.175 | -0.137 |
| FPRB5  | WITH HELP1  | 0.154 | 0.013  | 0.013  | 0.006  |
| FPRB5  | WITH HELP2  | 0.047 | -0.007 | -0.007 | -0.004 |
| FPRB5  | WITH FPRB1  | 0.212 | 0.015  | 0.015  | 0.007  |
| FPRB5  | WITH FPRB2  | 0.326 | -0.019 | -0.019 | -0.009 |
| FPRB6  | WITH PREP4  | 3.641 | 0.355  | 0.355  | 0.207  |
| FPRB6  | WITH HELP1  | 0.035 | -0.007 | -0.007 | -0.003 |
| FPRB6  | WITH HELP2  | 0.155 | 0.014  | 0.014  | 0.007  |
| FPRB6  | WITH FPRB1  | 0.006 | -0.003 | -0.003 | -0.001 |
| FPRB6  | WITH FPRB2  | 0.052 | -0.009 | -0.009 | -0.004 |
| FPRB6  | WITH FPRB3  | 0.088 | 0.013  | 0.013  | 0.004  |
| FPRB6  | WITH FPRB4  | 0.011 | -0.004 | -0.004 | -0.001 |
| FPRB7  | WITH HELP1  | 0.051 | 0.008  | 0.008  | 0.003  |
| FPRB7  | WITH HELP2  | 0.093 | 0.011  | 0.011  | 0.005  |
| FPRB7  | WITH FPRB3  | 0.269 | -0.022 | -0.022 | -0.007 |
| FPRB7  | WITH FPRB4  | 0.001 | 0.001  | 0.001  | 0.000  |
| FPRB8  | WITH HELP1  | 0.028 | 0.004  | 0.004  | 0.002  |
| FPRB8  | WITH HELP2  | 0.724 | -0.022 | -0.022 | -0.010 |
| FPRB8  | WITH FPRB1  | 0.402 | 0.016  | 0.016  | 0.006  |
| FPRB8  | WITH FPRB2  | 0.195 | -0.011 | -0.011 | -0.005 |
| FPRB8  | WITH FPRB3  | 0.550 | 0.065  | 0.065  | 0.020  |
| FPRB9  | WITH PREP3  | 0.016 | 0.004  | 0.004  | 0.003  |
| FPRB9  | WITH PREP4  | 0.528 | 0.026  | 0.026  | 0.015  |
| FPRB9  | WITH HELP1  | 0.151 | 0.008  | 0.008  | 0.003  |
| FPRB9  | WITH HELP2  | 0.017 | -0.002 | -0.002 | -0.001 |
| FPRB9  | WITH FPRB1  | 0.007 | 0.002  | 0.002  | 0.001  |
| FPRB9  | WITH FPRB2  | 0.017 | -0.003 | -0.003 | -0.001 |
| FPRB9  | WITH FPRB3  | 0.172 | 0.014  | 0.014  | 0.005  |
| FPRB9  | WITH FPRB4  | 0.186 | -0.016 | -0.016 | -0.005 |
| FPRB10 | WITH PREP3  | 0.056 | -0.008 | -0.008 | -0.004 |
| FPRB10 | WITH PREP4  | 0.000 | 0.001  | 0.001  | 0.000  |
| FPRB10 | WITH HELP1  | 0.175 | -0.010 | -0.010 | -0.004 |
| FPRB10 | WITH HELP2  | 0.086 | 0.007  | 0.007  | 0.003  |
| PHPRB1 | WITH PREP3  | 0.198 | -0.009 | -0.009 | -0.014 |
| PHPRB1 | WITH PREP4  | 0.091 | 0.006  | 0.006  | 0.010  |
| PHPRB1 | WITH HELP1  | 0.120 | -0.004 | -0.004 | -0.005 |
| PHPRB1 | WITH HELP2  | 0.400 | 0.009  | 0.009  | 0.012  |
| PHPRB1 | WITH HELP4  | 0.002 | -0.001 | -0.001 | -0.002 |
| PHPRB1 | WITH FPRB1  | 0.001 | -0.001 | -0.001 | -0.001 |
| PHPRB1 | WITH FPRB2  | 0.869 | -0.019 | -0.019 | -0.025 |
| PHPRB1 | WITH FPRB3  | 0.580 | -0.007 | -0.007 | -0.007 |
| PHPRB1 | WITH FPRB4  | 1.336 | 0.012  | 0.012  | 0.011  |
| PHPRB1 | WITH FPRB6  | 0.802 | 0.086  | 0.086  | 0.053  |
| PHPRB1 | WITH FPRB8  | 0.009 | 0.003  | 0.003  | 0.002  |
| PHPRB1 | WITH FPRB9  | 0.006 | 0.002  | 0.002  | 0.001  |
| PHPRB1 | WITH FPRB10 | 0.009 | 0.003  | 0.003  | 0.002  |
| PHPRB2 | WITH PREP1  | 0.002 | -0.002 | -0.002 | -0.004 |
| PHPRB2 | WITH HELP1  | 0.000 | 0.000  | 0.000  | 0.000  |
| PHPRB2 | WITH HELP3  | 1.439 | -0.029 | -0.029 | -0.058 |
| PHPRB2 | WITH HELP4  | 0.488 | 0.013  | 0.013  | 0.031  |
| PHPRB2 | WITH FPRB3  | 0.733 | 0.009  | 0.009  | 0.008  |

---

---

|        |             |       |        |        |         |
|--------|-------------|-------|--------|--------|---------|
| PHPRB2 | WITH FPRB4  | 0.750 | -0.009 | -0.009 | -0.008  |
| PHPRB2 | WITH FPRB5  | 0.043 | 0.016  | 0.016  | 0.011   |
| PHPRB2 | WITH FPRB8  | 0.036 | 0.006  | 0.006  | 0.003   |
| PHPRB2 | WITH FPRB10 | 0.584 | -0.023 | -0.023 | -0.014  |
| PHPRB3 | WITH PREP3  | 0.001 | -0.001 | -0.001 | 999.000 |
| PHPRB3 | WITH PREP4  | 0.124 | 0.007  | 0.007  | 999.000 |
| PHPRB3 | WITH HELP1  | 1.164 | -0.016 | -0.016 | 999.000 |
| PHPRB3 | WITH HELP2  | 0.020 | 0.002  | 0.002  | 999.000 |
| PHPRB3 | WITH HELP3  | 0.641 | 0.019  | 0.019  | 999.000 |
| PHPRB3 | WITH HELP4  | 0.097 | -0.008 | -0.008 | 999.000 |
| PHPRB3 | WITH FPRB3  | 0.111 | -0.005 | -0.005 | 999.000 |
| PHPRB3 | WITH FPRB4  | 0.182 | 0.006  | 0.006  | 999.000 |
| PHPRB3 | WITH FPRB8  | 0.007 | 0.004  | 0.004  | 999.000 |
| PHPRB3 | WITH FPRB9  | 0.690 | -0.029 | -0.029 | 999.000 |
| PHPRB3 | WITH FPRB10 | 1.899 | 0.057  | 0.057  | 999.000 |
| PHPRB3 | WITH PHPRB1 | 2.861 | 0.678  | 0.678  | 999.000 |
| PHPRB4 | WITH PREP1  | 0.035 | 0.004  | 0.004  | 999.000 |
| PHPRB4 | WITH PREP2  | 0.089 | -0.007 | -0.007 | 999.000 |
| PHPRB4 | WITH HELP1  | 4.616 | 0.326  | 0.326  | 999.000 |
| PHPRB4 | WITH FPRB3  | 0.047 | -0.005 | -0.005 | 999.000 |
| PHPRB4 | WITH FPRB4  | 0.010 | 0.002  | 0.002  | 999.000 |
| PHPRB4 | WITH FPRB5  | 0.003 | 0.006  | 0.006  | 999.000 |
| PHPRB5 | WITH PREP3  | 0.888 | -0.038 | -0.038 | -0.027  |
| PHPRB5 | WITH PREP4  | 0.896 | 0.039  | 0.039  | 0.028   |
| PHPRB5 | WITH HELP1  | 0.050 | 0.006  | 0.006  | 0.003   |
| PHPRB5 | WITH HELP2  | 0.024 | -0.004 | -0.004 | -0.002  |
| PHPRB5 | WITH PHPRB1 | 0.162 | 0.011  | 0.011  | 0.008   |
| PHPRB5 | WITH PHPRB2 | 0.006 | -0.002 | -0.002 | -0.002  |
| PHPRB5 | WITH PHPRB3 | 0.273 | -0.042 | -0.042 | 999.000 |
| PHPRB6 | WITH PREP1  | 1.177 | -0.025 | -0.025 | -0.017  |
| PHPRB6 | WITH PREP2  | 1.137 | 0.025  | 0.025  | 0.017   |
| PHPRB6 | WITH HELP1  | 0.886 | -0.020 | -0.020 | -0.008  |
| PHPRB6 | WITH HELP2  | 1.305 | 0.023  | 0.023  | 0.011   |
| PHPRB6 | WITH FPRB3  | 0.004 | -0.002 | -0.002 | -0.001  |
| PHPRB6 | WITH FPRB4  | 0.459 | 0.019  | 0.019  | 0.006   |
| PHPRB6 | WITH PHPRB1 | 0.425 | -0.020 | -0.020 | -0.012  |
| PHPRB6 | WITH PHPRB2 | 0.101 | 0.011  | 0.011  | 0.006   |
| PHPRB7 | WITH PREP1  | 0.144 | 0.010  | 0.010  | 0.006   |
| PHPRB7 | WITH PREP2  | 0.006 | 0.002  | 0.002  | 0.001   |
| PHPRB7 | WITH HELP1  | 0.449 | 0.017  | 0.017  | 0.006   |
| PHPRB7 | WITH HELP2  | 0.311 | -0.014 | -0.014 | -0.006  |
| PHPRB7 | WITH FPRB1  | 1.090 | 0.040  | 0.040  | 0.014   |
| PHPRB7 | WITH FPRB2  | 0.048 | 0.008  | 0.008  | 0.003   |
| PHPRB7 | WITH FPRB3  | 0.568 | -0.023 | -0.023 | -0.006  |
| PHPRB7 | WITH FPRB4  | 0.463 | -0.021 | -0.021 | -0.006  |
| PHPRB7 | WITH PHPRB2 | 0.234 | 0.028  | 0.028  | 0.014   |
| PHPRB7 | WITH PHPRB3 | 0.255 | -0.038 | -0.038 | 999.000 |
| PHPRB8 | WITH PREP3  | 0.387 | 0.080  | 0.080  | 0.033   |
| PHPRB8 | WITH HELP1  | 0.002 | -0.003 | -0.003 | -0.001  |
| PHPRB8 | WITH HELP3  | 0.397 | -0.026 | -0.026 | -0.013  |
| PHPRB8 | WITH HELP4  | 0.004 | 0.003  | 0.003  | 0.002   |
| PHPRB8 | WITH FPRB1  | 0.076 | -0.007 | -0.007 | -0.002  |
| PHPRB8 | WITH FPRB2  | 0.098 | 0.008  | 0.008  | 0.002   |
| PHPRB8 | WITH FPRB3  | 0.310 | -0.015 | -0.015 | -0.004  |
| PHPRB8 | WITH FPRB4  | 0.132 | 0.010  | 0.010  | 0.002   |
| PHPRB8 | WITH FPRB9  | 1.020 | 0.184  | 0.184  | 0.027   |
| PHPRB8 | WITH PHPRB1 | 0.174 | 0.010  | 0.010  | 0.004   |
| PHPRB8 | WITH PHPRB2 | 0.237 | -0.012 | -0.012 | -0.005  |
| PHPRB8 | WITH PHPRB3 | 0.048 | 0.008  | 0.008  | 999.000 |
| PHPRB8 | WITH PHPRB4 | 0.004 | -0.006 | -0.006 | 999.000 |
| PHPRB9 | WITH PREP1  | 0.037 | 0.004  | 0.004  | 0.002   |
| PHPRB9 | WITH PREP2  | 0.064 | 0.006  | 0.006  | 0.003   |
| PHPRB9 | WITH PREP4  | 0.905 | 0.046  | 0.046  | 0.020   |
| PHPRB9 | WITH HELP1  | 0.222 | -0.011 | -0.011 | -0.003  |

---

d:\flood2lok.out

---

|         |             |       |        |        |         |
|---------|-------------|-------|--------|--------|---------|
| PHPRB9  | WITH HELP2  | 0.001 | 0.001  | 0.001  | 0.000   |
| PHPRB9  | WITH HELP3  | 0.160 | 0.014  | 0.014  | 0.008   |
| PHPRB9  | WITH HELP4  | 0.001 | 0.002  | 0.002  | 0.001   |
| PHPRB9  | WITH FPRB1  | 0.122 | -0.008 | -0.008 | -0.003  |
| PHPRB9  | WITH FPRB2  | 0.037 | 0.004  | 0.004  | 0.001   |
| PHPRB9  | WITH FPRB3  | 0.024 | 0.004  | 0.004  | 0.001   |
| PHPRB9  | WITH FPRB4  | 0.218 | 0.011  | 0.011  | 0.003   |
| PHPRB9  | WITH FPRB7  | 0.364 | -0.066 | -0.066 | -0.010  |
| PHPRB9  | WITH FPRB10 | 0.325 | 0.047  | 0.047  | 0.007   |
| PHPRB9  | WITH PHPRB1 | 0.034 | -0.004 | -0.004 | -0.002  |
| PHPRB9  | WITH PHPRB2 | 0.332 | 0.013  | 0.013  | 0.006   |
| PHPRB9  | WITH PHPRB3 | 1.331 | -0.039 | -0.039 | 999.000 |
| PHPRB9  | WITH PHPRB4 | 0.234 | 0.041  | 0.041  | 999.000 |
| PHPRB9  | WITH PHPRB5 | 1.032 | 0.076  | 0.076  | 0.015   |
| PHPRB10 | WITH PREP1  | 0.000 | 0.000  | 0.000  | 0.000   |
| PHPRB10 | WITH PREP2  | 0.532 | -0.017 | -0.017 | -0.009  |
| PHPRB10 | WITH PREP4  | 0.271 | 0.026  | 0.026  | 0.011   |
| PHPRB10 | WITH HELP1  | 0.052 | 0.005  | 0.005  | 0.002   |
| PHPRB10 | WITH HELP2  | 0.000 | 0.000  | 0.000  | 0.000   |
| PHPRB10 | WITH HELP3  | 0.338 | 0.031  | 0.031  | 0.016   |
| PHPRB10 | WITH FPRB3  | 0.088 | -0.008 | -0.008 | -0.002  |
| PHPRB10 | WITH FPRB4  | 0.290 | -0.015 | -0.015 | -0.004  |
| PHPRB10 | WITH FPRB7  | 1.353 | 0.131  | 0.131  | 0.019   |
| PHPRB10 | WITH FPRB10 | 0.559 | 0.064  | 0.064  | 0.010   |
| PHPRB10 | WITH PHPRB1 | 0.010 | 0.004  | 0.004  | 0.002   |
| PHPRB10 | WITH PHPRB4 | 0.007 | -0.010 | -0.010 | 999.000 |
| PHPRB10 | WITH PHPRB5 | 0.215 | -0.035 | -0.035 | -0.007  |

#### DIAGRAM INFORMATION

Use View Diagram under the Diagram menu in the Mplus Editor to view the diagram.  
If running Mplus from the Mplus Diagrammer, the diagram opens automatically.

#### Diagram output

d:\flood2lok.dgm

Beginning Time: 19:59:01  
Ending Time: 19:59:01  
Elapsed Time: 00:00:00

MUTHEN & MUTHEN  
3463 Stoner Ave.  
Los Angeles, CA 90066

Tel: (310) 391-9971  
Fax: (310) 391-8971  
Web: [www.StatModel.com](http://www.StatModel.com)  
Support: [Support@StatModel.com](mailto:Support@StatModel.com)

Copyright (c) 1998-2015 Muthen & Muthen
